1           **Frontal cortical regulation of neurogenesis and cellular proliferation in the ventral**  
2                                               **subventricular zone**

3 **Authors/Affiliations:**

4 Moawiah M Naffaa<sup>1,2,†</sup>, Rehan R Khan<sup>2</sup>, Chay T. Kuo, Henry H. Yin<sup>1,3,†</sup>

5

6 1. Department of Psychology and Neuroscience; Duke University

7 2. Department of Cell Biology, Duke University, School of Medicine

8 3. Department of Neurobiology; Duke University School of Medicine

9

10 **†Correspondence:**

11 Moawiah Naffaa [moawiah.naffaa@duke.edu](mailto:moawiah.naffaa@duke.edu)

12 Henry Yin [hy43@duke.edu](mailto:hy43@duke.edu)

13

14 **Key words:** postnatal neurogenesis, subventricular zone, frontal cortex, anterior cingulate,  
15 subep-ChAT<sup>+</sup>, neural stem cells proliferation, calretinin

16

17 **Ethics declarations**

18 The authors declare no competing financial interests.

19

20

21 **Summary**

22 Neurogenesis and differentiation of the neural stem cells (NSCs) in the subventricular zone  
23 (SVZ) are controlled by cell-intrinsic molecular pathways that interact with extrinsic signaling  
24 cues. Here we identified a novel circuit that regulates neurogenesis and cellular proliferation in  
25 the lateral ventricle SVZ (LV-SVZ). Our results demonstrate direct glutamatergic inputs from  
26 the frontal cortex as well as local inhibitory interneurons, control the activity of distinctive  
27 cholinergic neurons in the subependymal zone (subep-ChAT<sup>+</sup>). *In vivo* optogenetic stimulation  
28 and inhibition in this circuit were sufficient to control local SVZ neurogenesis, LV NSCs  
29 proliferation, and SVZ cellular divisions in ventral SVZ. These findings shed light on local and  
30 distal neural circuit activity-dependent regulation of postnatal and adult SVZ neurogenesis and  
31 LV-SVZ cellular proliferation.

32

33

34           The rodent subventricular zone (SVZ) of the lateral ventricles (LV) is a major site of  
35 postnatal neurogenesis<sup>1</sup>. Neurogenesis in SVZ provides a useful model system for studying  
36 neuronal regeneration and tissue remodeling in the adult brain<sup>2,3</sup>. LV neural stem cells (NSCs)  
37 divide asymmetrically for self-renewal or differentiate to become transient amplifying  
38 intermediate progenitors (TAPs)<sup>4-6</sup>. These intermediate progenitors divide and differentiate into  
39 doublecortin-positive neuroblasts<sup>7,8</sup>, which migrate to the olfactory bulb (OB)<sup>7,9,10</sup>, where they  
40 become mature interneurons that are incorporated into the local circuitry<sup>11,12</sup>. The generation of  
41 adult-born neurons from the SVZ contributes to experience-dependent plasticity in the postnatal  
42 brain<sup>13,14</sup> and plays a critical role in social behavior in rodents<sup>12,15,16</sup>.

43           The LV NSCs receive inputs from a variety of sources, including neighboring NSCs,  
44 TAPs, and neuroblasts<sup>17,18</sup>. Different neurotransmitters, including GABA, dopamine, and  
45 serotonin, released by neurons in different brain regions, are also known to regulate postnatal and  
46 adult SVZ neurogenesis<sup>19-24</sup>. However, little is known about the local and distal circuitry which  
47 directly or indirectly influence the SVZ neurogenesis.

48           Recent work has identified a small population of cholinergic neurons in the  
49 subependymal space to the lateral ventricle. These neurons, which express Choline  
50 acetyltransferase (ChAT<sup>+</sup>), can modulate the proliferation of LV NSCs and neuroblasts in an  
51 activity-dependent manner<sup>25</sup>. They are unlike neighboring striatal cholinergic interneurons, and  
52 release acetylcholine (ACh) into the SVZ niche. We hypothesize that the population of  
53 subependymal ChAT<sup>+</sup> (subep-ChAT<sup>+</sup>) neurons in the ventral domain of SVZ is a key node in the  
54 neural circuit regulation of SVZ neurogenesis and LV NSCs proliferation. Using neural circuit  
55 tracing, electrophysiology and *in vivo* optogenetic strategies, we identified a novel neural circuit  
56 involving anterior cingulate glutamatergic projections and local calretinin-positive interneurons

57 that can regulate the activity of subep-ChAT<sup>+</sup> neurons. Consequently, this circuit directly  
58 modulate SVZ neurogenesis, activity of LV NSCs proliferation and SVZ cellular divisions in the  
59 ventral SVZ. These findings revealed a novel circuitry by which frontal cortical inputs can  
60 influence cholinergic signaling in ventral SVZ to modulate neurogenesis and cellular  
61 proliferation.

62

## 63 **Results**

### 64 **Excitatory and inhibitory presynaptic inputs to the subep-ChAT<sup>+</sup> neurons**

65 Unlike striatal cholinergic neurons, subep-ChAT<sup>+</sup> neurons do not show tonic activity in  
66 the absence of synaptic inputs, suggesting that excitatory inputs are needed to activate these  
67 neurons<sup>26</sup>. However, it is currently unknown where the excitatory inputs are generated from and  
68 how they influence the activity of subep-ChAT<sup>+</sup> neurons. We hypothesized that glutamatergic  
69 inputs from cortical projection neurons may provide excitatory drive of the subep-ChAT<sup>+</sup>  
70 neurons. The cortical neurons mainly express vesicular glutamate transporter 1 protein  
71 (VGlut1)<sup>27</sup>. To selectively stimulate these glutamatergic inputs, we crossed *VGlut1-Cre* mice  
72 with *ChAT-eGFP* and ChR2-tdTomato transgenic mouse line (*Ai27*) that expresses  
73 channelrhodopsin in a Cre-dependent manner<sup>28</sup>. The resulting *VGlut1-Cre; ChAT-eGFP; Ai27*  
74 mice express channelrhodopsin in all VGlut1<sup>+</sup> neurons (**Fig. 1A**).

75 Whole-cell recordings from subep-ChAT<sup>+</sup> neurons of *VGlut1-Cre; ChAT-eGFP; Ai27*  
76 mice showed robust firing in response to 473-nm light activation of VGlut1<sup>+</sup> axon terminals  
77 (firing frequency =  $5.375 \pm 0.324$  Hz) (**Fig. 1B**). In voltage-clamp mode (holding at -60 mV),  
78 photo-stimulation evoked excitatory postsynaptic currents (EPSCs) in the subep-ChAT<sup>+</sup> neurons.

79 The induced currents can be blocked by glutamatergic receptors blockers AP5 (NMDA receptor  
80 antagonist) and CNQX (AMPA receptor antagonist) (Current amplitude =  $98.2 \pm 10.7$  pA, and  
81 current latency =  $8.6 \pm 0.62$  ms) (**Fig. 1C**). These findings demonstrate the existence of cortical  
82 glutamatergic inputs that drive and regulate the activity of subep-ChAT<sup>+</sup> neurons.

83 To examine the inhibitory drivers of subep-ChAT<sup>+</sup> neurons, we crossed VGat-ChR2-  
84 eYFP (i.e.: channelrhodopsin expressed in GABAergic neurons) with *Chat-Cre* and *Ai27*. The  
85 result is VGat-ChR2-eYFP; *Chat-Cre*; *Ai27* mice which allow recording from subep-ChAT<sup>+</sup>  
86 neurons in animals with channelrhodopsin expressed in all GABAergic neurons (**Fig. 1D**).  
87 Whole-cell recordings from subep-ChAT<sup>+</sup> neurons in voltage-clamp mode (holding at -60 mV)  
88 and activating VGAT<sup>+</sup> axon terminals via 473-nm laser resulted in consistent inhibitory  
89 postsynaptic currents (IPSCs). The evoked IPSCs in the subep-ChAT<sup>+</sup> neurons were blocked by  
90 picrotoxin (GABA<sub>A</sub> receptors antagonist) (Current amplitude =  $196.1 \pm 24.13$  pA, and current  
91 latency =  $4.5 \pm 0.88$  ms) (**Fig. 1E**). These results suggest that subep-ChAT<sup>+</sup> neurons receive  
92 direct GABAergic inputs that manage their release of ACh in the SVZ.

### 93 **Developing rabies virus strategy for tracing neural circuit**

94 Our initial electrophysiological recording results established the presence of excitatory  
95 and inhibitory modulators to the activity of subep-ChAT<sup>+</sup> neurons (**Fig. 1F**). However, it remains  
96 unclear exactly where these inputs originated. To answer this question, we generated a Cre-  
97 dependent *R26R-FLEX-TVA-2A-RabiesG-2A-tdTomato-FLEX (R26F-RTT)* mice to trace the  
98 connectivity of subep-ChAT<sup>+</sup> neurons via a single Rabies viral injection (**Fig. 2A & B**). This  
99 new tracing tool allows for expressing TVA, RabiesG and tdTomato in all Cre-expressing  
100 neurons. The *R26F-RTT* mice were first tested by injecting EnvA G-deleted Rabies-eGFP virus  
101 into the striatum where no nonspecific rabies infections were detected at the injection site

102 **(Extended Fig. 1A & B)**. For examining the specific expression of TVA, RabiesG and tdTomato  
103 in Cre-dependent mice, *R26F-RTT* mice were crossed with *chat-Cre*, *VGat-Cre* and *D2-Cre* to  
104 generate *R26F-RTT; chat-Cre*, *R26F-RTT; VGat-Cre* and *R26F-RTT; D2-Cre* mice, respectively.  
105 In *R26F-RTT; chat-Cre* mice, all ChAT<sup>+</sup> neurons were only found to express tdTomato  
106 **(Extended Fig. 1C)**, which indicates that *R26F-RTT* mice are selectively expressed in Cre-  
107 positive neurons. To assess the retrogradely trans-synaptic spread of rabies with *R26F-RTT*,  
108 EnvA G-deleted Rabies-eGFP virus was injected into the striatum of *R26F-RTT; VGat-Cre* and  
109 *R26F-RTT; D2-Cre* mice **(Extended Fig. 2A & C)**. After 7-days, the cortical excitatory neurons  
110 in cingulate and secondary motor cortices which are presynaptically connected to the striatal  
111 VGat<sup>+</sup> and D2<sup>+</sup> neurons were found labeled with GFP **(Extended Fig. 2B & D)**. This indicates  
112 that rabies can retrogradely spread from Cre-positive VGat<sup>+</sup> and D2<sup>+</sup> neurons when they are  
113 crossed with *R26F-RTT* mice. Together, these results demonstrated that *R26F-RTT* mice can  
114 express TVA, RabiesG and tdTomato selectively in Cre-expressing neurons and allows for  
115 retrograde presynaptic neuronal tracing.

116 To allow for neural tracing of cholinergic neurons, we generated *ChAT-Cre; R26F-RTT*  
117 mice to express TVA receptor, RabiesG protein, and tdTomato in all cholinergic neurons **(Fig.**  
118 **2B)**. We first injected EnvA G-deleted rabies-eGFP virus into the striatum of P30 *ChAT-Cre;*  
119 *R26F-RTT* mice **(Extended Fig. 3A)**. As the striatal cholinergic neurons receive synaptic inputs  
120 from each other<sup>29</sup>, an infection of a striatal cholinergic neuron with EnvA G-deleted Rabies-  
121 eGFP virus results in polysynaptic labeling of other neighbor striatal cholinergic neurons, which  
122 subsequently pass rabies to other connected neurons **(Extended Fig. 3B & C)**. Then, EnvA G-  
123 deleted Rabies-eGFP virus was injected into the LV of *ChAT-Cre; R26F-RTT* mice to target  
124 subep-ChAT<sup>+</sup> neurons, immediately following mannitol injection to disrupt the ependymal layer

125 locally (**Fig. 2C & F**). Using this strategy, we were able to selectively infect a subep-ChAT<sup>+</sup>  
126 neuron and trace their presynaptic inputs (**Fig. 2D & G**). The local connectivity of subep-ChAT<sup>+</sup>  
127 neurons and their projections were checked at 7- and 14-days post rabies injection (**Fig. 2D, E, G**  
128 **& H**). Unlike striatal cholinergic neurons, subep-ChAT<sup>+</sup> neurons in the SVZ niche are not  
129 connected with neighboring striatal cholinergic neurons (**Fig. 2I**). These results confirm that  
130 subep-ChAT<sup>+</sup> neurons have distinct neuronal connectivity.

### 131 **Local presynaptic inhibitory input to subep-ChAT<sup>+</sup> neurons**

132 Injection of EnvA G-deleted Rabies-eGFP virus into the LV of *ChAT-Cre; R26F-RTT*  
133 mice revealed local GFP<sup>+</sup> interneurons adjacent to the infected subep-ChAT<sup>+</sup> neurons (**Fig. 3A**  
134 **& B**). While staining for markers of the known inhibitory neurons, colocalization between GFP<sup>+</sup>  
135 interneurons and calretinin (CR) antibody was noticed (**Fig. 3C**).

136 To test if the CR<sup>+</sup> interneurons provide local inhibitory inputs to subep-ChAT<sup>+</sup> neurons,  
137 we performed whole-cell patch clamp recording from subep-ChAT<sup>+</sup> neurons of *Cr-Cre; ChAT-*  
138 *eGFP; Ai29* mice (**Fig. 3D**). A high-chloride internal solution was used to detect inhibitory  
139 postsynaptic currents (IPSCs) while holding at -60 mV in voltage clamp. We stimulated local  
140 CR<sup>+</sup> interneurons with blue light and revealed robust evoked IPSCs, which were completely  
141 blocked by picrotoxin (current amplitude =  $122.3 \pm 9.0$  pA, and current latency =  $4.9 \pm 0.33$  ms)  
142 (**Fig. 3E**). Then, we tested for other known inhibitory interneurons expressing calbindin (CB<sup>+</sup>),  
143 somatostatin (SST<sup>+</sup>) or parvalbumin (PV<sup>+</sup>) (**Extended Fig. 4A**). Using whole-cell recording from  
144 subep-ChAT<sup>+</sup> neurons, an optogenetic stimulation of GABA released from these inhibitory  
145 interneurons (i.e.: CB, SST and PV) did not induce IPSCs (**Extended Fig. 4B**).

146 To further confirm the local CR<sup>+</sup> interneuron inputs to the subep-ChAT<sup>+</sup> neurons, we  
147 used a Patterned Light Stimulator LED controller (Mightex) to target CR<sup>+</sup> labelled neurons in  
148 SVZ wholemount of *Cr-Cre; Chat-eGFP; Ai29* mice. Focal optogenetic activation of a single  
149 CR<sup>+</sup> interneuron generated IPSCs in subep-ChAT<sup>+</sup> neuron (current amplitude =  $40.14 \pm 3.78$  pA,  
150 and current latency =  $4.7 \pm 0.4$  ms) (**Fig. 3F & G**). Subsequently, we stained against CR and  
151 ChAT using *C57BL/6J* mice, revealing the presence of 2-4 CR<sup>+</sup> interneurons surrounding each  
152 subep-ChAT<sup>+</sup> neuron in the LV-SVZ (**Fig. 3H & I**). Together these results confirm that local  
153 CR<sup>+</sup> interneurons are the main source of inhibitory inputs to the subep-ChAT<sup>+</sup> neuron.

#### 154 **Presynaptic excitatory inputs from cingulate cortex area 1 (Cg1) to subep-ChAT<sup>+</sup> neurons**

155 To illuminate long distance connections for subep-ChAT<sup>+</sup> neurons in the brain, EnvA  
156 rVSV-eGFP (EnvA/RABVG-eGFP) virus<sup>30</sup> was injected into the LV of *Chat-Cre; R26F-RTT*  
157 mice (**Fig. 4A**). Distal GFP<sup>+</sup> projection neurons from the anterior cingulate cortex area 1 (Cg1)  
158 were observed in the ipsilateral hemisphere only (**Fig. 4B**). To confirm the Cg1 input to subep-  
159 ChAT<sup>+</sup> neurons, pAAV-CaMKIIa-hChR2(E123A)-mCherry virus was first injected into the Cg1  
160 region of *C57BL/6J* mice to express mCherry in the GFP<sup>+</sup> neurons from Figure 4B (**Fig. 4C**). By  
161 tracing their projections in the SVZ region, we observed them adjacent to the subep-ChAT<sup>+</sup>  
162 neurons (**Fig. 4D**).

163 To functionally examines a monosynaptic input from Cg1 to the subep-ChAT<sup>+</sup> neurons, a  
164 general ChR2 viral vector (pAAV-CaMKIIa-hChR2(E123T/T159C) -EYFP) was injected into  
165 the Cg1 region of *Chat-Cre; Ai9* mice to express ChR2 in the projections of Cg1 neurons (**Fig.**  
166 **4E**). Optogenetic stimulation of the cingulate cortex projections reliably evoked action potentials  
167 in subep-ChAT<sup>+</sup> neurons (firing frequency =  $2.5 \pm 0.327$  Hz) (**Fig. 4F**). Using voltage clamp, the  
168 optogenetic stimulation induced reliable EPSCs in subep-ChAT<sup>+</sup> neurons which were completely



169 blocked by the glutamate antagonists (AP5 and CNQX) (current amplitude =  $64.86 \pm 2.424$  pA,  
170 and current latency =  $9.1 \pm 0.7$  ms) (**Fig. 4G**). These results confirm the presence of  
171 glutamatergic neurons in the ipsilateral Cg1 region that excite subep-ChAT<sup>+</sup> neurons.

172 To further confirm the (Cg1-subep-ChAT<sup>+</sup>) circuit, pAAV-Ef1a-DIO  
173 hChR2(E123T/T159C)-mCherry virus was injected into the Cg1 region of *VGlut1-Cre; ChAT-*  
174 *eGFP* mice to express ChR2 in Cg1 VGlut1<sup>+</sup> neurons (**Fig. 4H**). In the voltage clamp mode,  
175 reliably EPSCs were generated in subep-ChAT<sup>+</sup> neurons upon optogenetic stimulation of Cg1  
176 VGlut1<sup>+</sup> neurons projection (**Fig. 4I, Left**). The induced EPS currents were completely blocked  
177 by AP5 and CNQX, confirming the presence of Cg1 glutamatergic inputs (current amplitude =  
178  $53.29 \pm 2.96$  pA, and current latency =  $8.7 \pm 0.44$  ms) (**Fig. 4I, Right**). These findings show that  
179 a specific population of cortical neurons in the Cg1 region provides excitatory drive to subep-  
180 ChAT<sup>+</sup> neurons.

181 ***Calretinin-Cre (Cr-Cre)* mice label the distal Cg1 excitatory presynaptic input to the subep-**  
182 **ChAT<sup>+</sup> neurons**

183 After identifying Cg1 glutamatergic input into subep-ChAT<sup>+</sup> neurons using rabies neural  
184 tracing and electrophysiological recording, (Cg1-subep-ChAT<sup>+</sup>) circuit was then further tested  
185 by injecting AAVrg viruses (i.e.: retrograde tracing using AAV viruses) into LVs of *C57BL/6J*,  
186 *VGlut1-Cre* and *CR-Cre* mice. Upon injection of pAAVrg-hSyn-mCherry and pAAVrg-hSyn-  
187 DIO-mCherry viruses into LVs of *C57BL/6J* and *VGlut1-Cre* mice, respectively (**Extended Fig.**  
188 **5A & C**), we observed mCherry<sup>+</sup> neurons in the ipsilateral Cg1 region (**Extended Fig. 5B & D**).  
189 Surprisingly, injecting pAAVrg-hSyn-DIO-mCherry virus into the LV of *CR-Cre* mice labels  
190 neurons in the ipsilateral Cg1 region (**Fig. 5A & B**). The detected mCherry<sup>+</sup> neurons in the Cg1  
191 of *C57BL/6J*, *VGlut1-Cre* and *CR-Cre* mice post pAAVrg virus injections and the GFP<sup>+</sup> Cg1

192 neurons in **Fig. 4B** are located along the same rostro-caudal axis of the Cg1 region. These  
193 findings strongly suggest that the Cg1 presynaptic glutamatergic drivers of subep-ChAT<sup>+</sup>  
194 neurons are calretinin<sup>+</sup> (CR<sup>+</sup>) during the postnatal period.

195 To examine that these Cg1 glutamatergic inputs to the subep-ChAT<sup>+</sup> neurons are CR<sup>+</sup>  
196 neurons, whole-cell recordings from subep-ChAT<sup>+</sup> neurons were first performed in *Cr-Cre*;  
197 *Chat-eGFP*; *Ai27* mice (**Fig. 5C**). In voltage mode at -60 mV, optogenetic stimulation of CR<sup>+</sup>  
198 terminals reliably evoked EPSCs (Current amplitude =  $106 \pm 6.68$  pA, and current latency =  $5.13$   
199  $\pm 0.44$  ms), which were completely blocked by AP5 and CNQX (**Fig. 5D**). This predicts that the  
200 population of Cg1 glutamatergic that drives the activity of subep-ChAT<sup>+</sup> neurons are CR<sup>+</sup>  
201 postnatally. To further functionally testing whether these Cg1 excitatory CR<sup>+</sup> neurons regulate  
202 the activity of subep-ChAT<sup>+</sup> neurons, we injected AAV-EF1a-DIO-hChR2(E123T/T159C)-  
203 mCherry virus into the Cg1 region of *Cr-Cre*; *Chat-eGFP* mice (**Fig. 5E**). Whole-cell recording  
204 from subep-ChAT<sup>+</sup> neurons in voltage clamp mode induced EPSCs upon optogenetic stimulation  
205 (Current amplitude =  $33 \pm 2.46$  pA, and latency =  $5.13 \pm 0.44$  ms) (**Fig. 5F**). All previous data  
206 confirm that a specific population of cortical neurons in Cg1 region (VGlut1<sup>+</sup> and CR<sup>+</sup>) provides  
207 excitatory drive to subep-ChAT<sup>+</sup> neurons (**Fig. 5G**).

208 The total number of labeled Cg1 cortical neurons with *Cr-Cre* mice during postnatal  
209 period is must lower than the number of labeled neurons with *VGlut1-Cre* mice. Thereby, the *Cr-*  
210 *Cre* mouse is a reliable tool to study the population of glutamatergic neurons from the Cg1  
211 region that control the activity of subep-ChAT<sup>+</sup> neurons.

212 ***in vivo* (Cg1-subep-ChAT<sup>+</sup>) circuit stimulation regulate neurogenesis in the ventral domain**  
213 **of SVZ**

214 Based on our earlier findings, we defined the Cg1 presynaptic excitatory drivers of  
215 subep-ChAT<sup>+</sup> neurons. Thereafter, we studied the *in vivo* functional role of (Cg1-subep-ChAT<sup>+</sup>)  
216 circuit on SVZ neurogenesis and LV cellular proliferation. We hypothesized that this circuit  
217 regulate SVZ neurogenesis surrounding subep-ChAT<sup>+</sup> neurons by modulating the cellular  
218 proliferation in the ventral SVZ. To fulfill this aim, AAV-EF1a-DIO-hChR2 (E123T/T159C)-  
219 mCherry virus was injected into ipsilateral Cg1, and optical fibers were implanted into the Cg1  
220 regions of *Cr-Cre* mice (**Fig. 6A**). The optogenetic stimulation was continuously conducted for  
221 2- or 3-days and delivered by TTL control of 473-nm laser, 10 ms pulses at 10 Hz, lasting 10 s,  
222 given once every 1 min (**Fig. 6B and Extended Fig. 6A**).

223 In the 2-days circuit stimulation experiments, the mice were perfused immediately after  
224 stimulation cessation and brain slices of the stimulated Cg1 sections were stained against ChAT,  
225 phospho-S6 ribosomal (P-S6) and doublecortin (DCX) antibodies. To confirm (Cg1-subep-  
226 ChAT<sup>+</sup>) circuit activation in the studied coronal sections, the neuronal activity of subep-ChAT<sup>+</sup>  
227 neurons in these sections was determined by quantifying the intensity of P-S6 protein (**Extended**  
228 **Fig. 6B (B' & B'')**; **upper**). Among the included coronal sections in our studies, subep-ChAT<sup>+</sup>  
229 neurons on the ipsilateral side showed significantly higher P-6S intensity than their counterpart  
230 on the contralateral side within the same brain ( $43.9 \pm 7.3\%$ ) (**Extended Fig. 6C**). In these  
231 sections, the doublecortin (DCX<sup>+</sup>) neuroblasts surrounding subep-ChAT<sup>+</sup> neurons on the  
232 activation side were not clustered and were mainly disordered unlike their counterpart DCX<sup>+</sup>  
233 neuroblasts on the contralateral side (**Extended Fig. 6B (B' & B'')**; **lower**). This observed  
234 disorganized pattern of the clustered local DCX<sup>+</sup> cells adjacent to the activated subep-ChAT<sup>+</sup>  
235 neurons may be related to the continuous stimulation of the circuit which result in a local  
236 constant release of ACh. Although the circuit was stimulated for two days, the quantification of

237 the total number of DCX<sup>+</sup> neuroblasts showed no significant difference between the ipsilateral  
238 (activated) and contralateral (control) sides of these coronal sections (**Extended Fig. 6D**). The  
239 total DCX<sup>+</sup> cells in the whole SVZ were also assessed by quantifying the intensity of DCX  
240 staining on the ipsilateral SVZ (stimulated) vs. contralateral SVZ (control) (**Extended Fig. 6E**).  
241 The intensity of DCX was remarkably higher in the activated SVZ compared to the control SVZ  
242 ( $17.7 \pm 6.6\%$ ) (**Extended Fig. 6F**).

243 In (Cg1-subep-ChAT<sup>+</sup>) circuit stimulation experiment for 3-days, the neuronal activity of  
244 subep-ChAT<sup>+</sup> neurons was first examined in the coronal sections which were used for functional  
245 studies (**Fig. 6C (C' & C'')**; **upper**). These sections have shown remarkable higher P-S6  
246 intensity in the ipsilateral (activated) subep-ChAT<sup>+</sup> neurons compared to the subep-ChAT<sup>+</sup>  
247 neuron in the contralateral (control) side of the same brain ( $37.8 \pm 8.2\%$ ) (**Fig. 6D**). The DCX<sup>+</sup>  
248 neuroblasts surrounding the subep-ChAT<sup>+</sup> neurons on the activation side were highly  
249 randomized and not clustered as their comparative DCX<sup>+</sup> cells on the contralateral side (**Fig. 6C**  
250 **(C' & C'')**; **lower (red arrows)**). Due to the persistent stimulation of subep-ChAT<sup>+</sup> neurons,  
251 constant generation of DCX<sup>+</sup> neuroblasts was observed, thus many neuroblasts migrate before  
252 they cluster together (**Fig. 6E; red arrows**). Notably, the higher rate of newly produced DCX<sup>+</sup>  
253 neuroblasts in the activated side compared to the control side led to more accumulation of  
254 neuroblasts on the margins of the dorsal and ventral SVZ domains (**Fig. 6E; blue arrows**). The  
255 total number of DCX<sup>+</sup> cells in the stimulated coronal section of the ipsilateral side was  
256 significantly higher than on the contralateral side ( $25.2 \pm 4.3\%$ ) (**Fig. 6F**). Although, the  
257 intensity of DCX staining of the stimulated and control SVZ wholemounts does not appear to be  
258 significantly different from each other (**Fig. 6G & H**), it was observed to be less in the area

259 surrounding subep-ChAT<sup>+</sup> neurons of the stimulated ventral SVZ compared to the control ventral  
260 SVZ (**Fig. 6G; yellow dotted circle**).

261 ***in vivo* (Cg1-subep-ChAT<sup>+</sup>) circuit stimulation regulate cellular proliferation in the ventral**  
262 **domain of SVZ**

263 So far, we demonstrated the role of (Cg1-subep-ChAT<sup>+</sup>) circuit in regulating the activity  
264 of ventral SVZ neurogenesis. Subsequently, we studied the impact of this circuit on the regional  
265 LV cellular proliferation around subep-ChAT<sup>+</sup> neurons in the ventral SVZ. To achieve this goal,  
266 AAV-EF1a-DIO-hChR2 (E123T/T159C)-mCherry virus was injected into ipsilateral Cg1, and  
267 optical fibers were implanted into the Cg1 regions of *Cr-Cre* mice (**Fig. 7A; right**). To test the  
268 stimulation effect of (Cg1-subep-ChAT<sup>+</sup>) circuit on the LV-SVZ cellular proliferation, the circuit  
269 was activated for one day and 5-Ethynyl-2'-deoxyuridine (EdU) was intraperitoneally (IP)  
270 injected within the last 2-3 hours before mice were sacrificed. (**Fig. 7A; left**). Due to the spatial  
271 cellular arrangements of proliferative cells and subep-ChAT<sup>+</sup> neurons in the LV-SVZ neurogenic  
272 niche, we used SVZ wholemount to observe the cellular proliferation in the V-SVZ (i.e.: the  
273 proliferative cells underneath ependymal cells and 4-6um above subep-ChAT<sup>+</sup> neurons) and  
274 SVZ (i.e.: the proliferative cells lining around the subep-ChAT<sup>+</sup> neurons) (**Fig. 7B**).

275 Prior to observing the cellular proliferation in the area around subep-ChAT<sup>+</sup> neurons, we  
276 first examined the neuronal activity of subep-ChAT<sup>+</sup> neurons in the stimulated SVZ wholemount  
277 compared to their counterpart in the control SVZ wholemount. A mouse in each group of the  
278 stimulated mice was used to inspect and analyze the neuronal activity of subep-ChAT<sup>+</sup> neurons  
279 (**Extended Fig. 7A**). In these devoted mice, the activity of subep-ChAT<sup>+</sup> neurons in the  
280 stimulated SVZ was higher than in the control ones ( $31.6 \pm 7.8\%$ ) (**Extended Fig. 7B**). A  
281 combination of EdU with either GFAP (glial fibrillary acidic protein) or pEGFR (epidermal

282 growth factor receptor (phospho Y1068)) markers were used to view the cellular proliferation  
283 adjacent to subep-ChAT<sup>+</sup> neurons in the ventral SVZ (**Fig. 7C & E**). While GFAP<sup>+</sup> cells (i.e.: A  
284 marker of quiescent NSCs (qNSCs) and early activated NSCs (aNSCs))<sup>6</sup> were observed mainly  
285 in the V-SVZ (**Fig. 7C**), the number of spatially localized EdU<sup>+</sup>/GFAP<sup>+</sup> cells above the subep-  
286 ChAT<sup>+</sup> neurons in the ipsilateral V-SVZ (activated) (**Fig. 7C'**) were higher than in the  
287 contralateral V-SVZ (control) (**Fig. 7C''**) ( $3 \pm 0.56\%$ ) (**Fig. 7D**). This shows that (Cg1-subep-  
288 ChAT<sup>+</sup>) circuit regulates the proliferative activity of LV NSCs in the ventral SVZ.

289 pEGFR is a known marker for labeling both the aNSCs and transit amplifying cells  
290 (TAC)<sup>6</sup> which was utilized here to study the cellular proliferation in the V-SVZ and SVZ post  
291 (Cg1-subep-ChAT<sup>+</sup>) circuit stimulation (**Fig. E**). In the ipsilateral V-SVZ, the number of  
292 spatially localized EdU<sup>+</sup>/pEGFR<sup>+</sup> cells above the subep-ChAT<sup>+</sup> neurons were notably higher  
293 than in the control V-SVZ (**Fig. 7E' & E''; upper**) ( $2.23 \pm 0.5\%$ ) (**Fig. 7F; left**). This strongly  
294 suggests that (Cg1-subep-ChAT<sup>+</sup>) circuit has a role in the regulation of LV NSCs activity. In  
295 addition, there are more observed EdU<sup>+</sup>/pEGFR<sup>+</sup> cells around subep-ChAT<sup>+</sup> neurons in the  
296 stimulated SVZ than in control SVZ (**Fig. 7E' & E''; lower**) ( $1.92 \pm 0.43\%$ ) (**Fig. 7F; right**).  
297 The presence of more proliferative cells in both the V-SVZ and SVZ following the (Cg1-subep-  
298 ChAT<sup>+</sup>) circuit stimulation proposes that this circuit is involved in modulating the activity of  
299 NSCs and cellular division in the LV-SVZ.

### 300 ***in vivo* (Cg1-subep-ChAT<sup>+</sup>) circuit inhibition modulate SVZ neurogenesis and LV cellular** 301 **proliferation in the ventral SVZ**

302 Our previous results predicted that the (Cg1-subep-ChAT<sup>+</sup>) circuit controls neurogenesis  
303 and cellular proliferative activity in the ventral domain of LV-SVZ. To further understand the  
304 role of this circuit, we hypothesized that *in vivo* optogenetic inhibition of (Cg1-subep-ChAT<sup>+</sup>)

305 circuit is sufficient to modulate the activity of SVZ neurogenesis around subep-ChAT<sup>+</sup> neurons.  
306 To achieve that, pAAV\_hSyn1-SIO-stGtACR2-FusionRed virus was injected into ipsilateral  
307 Cg1, and optical fibers were implanted into the Cg1 regions of *Cr-Cre* mice (**Fig. 8A**). The  
308 inhibition of Cg1 CR<sup>+</sup> neurons were continuously conducted for two days and were delivered by  
309 TTL control of a 473-nm laser (**Fig. 8B**). The mice were perfused directly after the circuit  
310 inhibition was terminated and brain slices of the targeted sections were stained against DCX,  
311 ChAT and P-S6 antibodies. The coronal sections included in our studies showed higher neuronal  
312 activity of subep-ChAT<sup>+</sup> neurons on the ipsilateral (inhibited) side compared to the activity of  
313 subep-ChAT<sup>+</sup> neurons on the control side within the same mice brain (**Fig. 8C (C' & C'')**;  
314 **upper**) ( $-31.25 \pm 9.03\%$ ) (**Fig. 8D**). Adjacent to the subep-ChAT<sup>+</sup> neurons on the ipsilateral  
315 (inhibited) side, the number of DCX<sup>+</sup> neuroblasts were significantly lower than their counterpart  
316 on the control side (**Fig. 8C (C' & C'')**; **lower**). These results indicate that the (Cg1-subep-  
317 ChAT<sup>+</sup>) circuit regulates local neurogenesis in the ventral SVZ. Furthermore, the total number of  
318 DCX<sup>+</sup> neuroblasts on the ipsilateral side was lower than their comparative neuroblasts on the  
319 contralateral ones ( $-16.4 \pm 3.2\%$ ) (**Fig. 8E & F**). All previous findings proposed a crucial role for  
320 (Cg1-subep-ChAT<sup>+</sup>) circuit in managing neurogenesis of areas surrounding subep-ChAT<sup>+</sup>  
321 neurons in the ventral SVZ.

322 Subsequently, the inhibition effect of (Cg1-subep-ChAT<sup>+</sup>) circuit on the LV-SVZ cellular  
323 proliferative activity around subep-ChAT<sup>+</sup> neurons was investigated. To accomplish this,  
324 pAAV\_hSyn1-SIO-stGtACR2-FusionRed virus was injected into ipsilateral Cg1, and optical  
325 fibers were implanted into the Cg1 regions of *Cr-Cre* mice (**Fig. 8A**). The (Cg1-subep-ChAT<sup>+</sup>)  
326 circuit was continuously blocked for one day and EdU injected within the last 2-3 hours before  
327 mice were sacrificed (**Fig. 8G**). The neuronal activity of subep-ChAT<sup>+</sup> neurons was examined in

328 the ipsilateral SVZ and compared to their counterpart in control SVZ within every studied group  
329 of mice as described in the previous section (**Extended Fig. 8A**). In the used mice for this  
330 purpose, the subep-ChAT<sup>+</sup> neurons in the ipsilateral SVZ wholemounts have shown remarkably  
331 lower activity than their contralateral counterparts ( $-38.1 \pm 7.57\%$ ) (**Extended Fig. 8B**). Upon  
332 staining for GFAP and EdU markers, the number of spatially localized EdU<sup>+</sup>/GFAP<sup>+</sup> cells above  
333 subep-ChAT<sup>+</sup> neurons in the ipsilateral V-SVZ (**Extended Fig. 9A'**) was noticeably less than in  
334 the control V-SVZ (**Extended Fig. 9A''**) ( $-1.77 \pm 0.55\%$ ) (**Fig. 9B**). This suggests that (Cg1-  
335 subep-ChAT<sup>+</sup>) circuit modulates the proliferative activity of LV-NSCs. Furthermore, both  
336 pEGFR and EdU markers were applied together to study the effect of circuit inhibition on the  
337 proliferative activity of LV aNSCs and TAC in the V-SVZ and SVZ, respectively. The number  
338 of EdU<sup>+</sup>/pEGFR<sup>+</sup> cells that spatially resides over the subep-ChAT<sup>+</sup> neurons in the ipsilateral V-  
339 SVZ was observably lower than in the contralateral V-SVZ (**Fig. 8H' & H''; upper**) ( $-2.5 \pm$   
340  $0.1\%$ ) (**Fig. 8I; left**). Additionally, the noticed number of EdU<sup>+</sup>/pEGFR<sup>+</sup> cells around subep-  
341 ChAT<sup>+</sup> neurons in the ipsilateral SVZ was less than in control SVZ (**Fig. 8H' & H''; lower**) ( $-$   
342  $2.7 \pm 0.68\%$ ) (**Fig. 8I; right**). Together, these findings suggest that (Cg1-subep-ChAT<sup>+</sup>) circuit  
343 has regulatory roles on the proliferative activity of NSCs and cellular division in the ventral LV-  
344 SVZ.

345

## 346 **Discussion**

347 Postnatal and adult LV NSCs proliferation and SVZ neurogenesis are known to be  
348 modulated by neural activity<sup>18</sup>. Here, we identified a novel circuit controlling SVZ  
349 neurogenesis and LV-SVZ cell proliferation in the LV-SVZ. Using a Rabies tracing strategy, we  
350 determined the source of presynaptic inputs to the subep-ChAT<sup>+</sup> neurons, which are



351 demonstrated to direct LV NSCs proliferation<sup>25</sup>. Our results showed that subep-ChAT<sup>+</sup> neurons  
352 have a different pattern of neural connectivity than the striatal cholinergic neurons which are  
353 connected with their adjacent striatal cholinergic neurons<sup>31</sup>. Interestingly, we found that  
354 glutamatergic inputs from a specific VGlut1<sup>+</sup> neuronal population in the anterior cingulate cortex  
355 area 1 (Cg1) that projects directly to subep-ChAT<sup>+</sup> neurons. This is the first identification of a  
356 distal cortical input that monosynaptically drives subep-ChAT<sup>+</sup> neurons and regulate their  
357 activity in the SVZ niche. In addition, we also identified a small population of local GABAergic  
358 calretinin (CR<sup>+</sup>) interneurons that directly inhibit subep-ChAT<sup>+</sup> neurons. Previously, GABA was  
359 shown to be involved in various functions in the SVZ such as enhancing neuroblast maturation  
360 <sup>32</sup>, and preserving the postnatal/adult LV NSCs by inhibiting their proliferation and  
361 differentiation, but the source of GABA was largely unclear <sup>21,33</sup>. We demonstrated here for the  
362 first time GABAergic CR<sup>+</sup> interneurons are a local source of GABA. Future studies may reveal  
363 the neuronal connectivity of these distinct local CR<sup>+</sup> interneurons and other roles in the LV-SVZ  
364 cell proliferation and neurogenesis processes.

365         The subep-ChAT<sup>+</sup> neurons predominantly reside in the ventral domain of the SVZ. *In*  
366 *vivo* optogenetics stimulation and inhibition of the defined (Cg1-subep-ChAT<sup>+</sup>) circuit is  
367 sufficient to modulate SVZ neurogenesis surrounding the subep-ChAT<sup>+</sup> neurons in the ventral  
368 area. While this strongly suggests that subep-ChAT<sup>+</sup> neurons release ACh locally in the ventral  
369 SVZ, further research can be directed to understand their axon terminals in the whole SVZ niche.  
370 In consequence, *in vivo* optogenetics modulation of this circuit is also sufficient to regulate the  
371 activity of LV NSCs proliferation and cellular division regionally in the ventral areas of LV-  
372 SVZ. Future research may explore the molecular mechanisms of subep-ChAT<sup>+</sup> neuronal  
373 regulation of the LV NSCs activity and cellular divisions in V-SVZ and SVZ, respectively.

374 Taken together, our results uncover a new neural circuit that allows direct cortical  
375 regulation of the LV-SVZ neurogenesis. In humans, there is evidence for active neurogenesis at  
376 the wall of the lateral ventricles that generate migratory neuroblasts for up to two years after  
377 birth<sup>34</sup>, but the circuit mechanism is unknown. The analogous process in rodents may shed light  
378 on how the neurogenesis during postnatal brain development is influenced by synaptic inputs and  
379 neural activity. At present, how cortical inputs to the SVZ are related to environmental factors  
380 and behavior remains unclear, but our results promise to bridge neural circuit activity with  
381 neurogenesis and open a new avenue of research into cortical activity dependent SVZ  
382 neurogenesis in postnatal and adult animals.

383

## 384 **Methods**

### 385 **Animals**

386 All experiments were approved by the Institutional Animal Care and Use Committee at  
387 Duke University. Mice were group housed on a standard 12 h light/dark cycle (lights on at 7  
388 a.m.) with a controlled average ambient temperature of 21 °C and 45% humidity. The following  
389 mouse lines were purchased from JAX: *C57BL/6J* (000664); *VGlut1-Cre* (023527); *ChAT-eGFP*  
390 (007902); *ChR2(RCL-hChR2(H134R)/tdT)-D (Ai27)* (012567); *ChAT-Cre* (006410); *Cr-Cre*  
391 (010774); *VGat-Cre* (016962); *Cb-Cre* (028532); *SST-Cre* (013044); *PV-Cre* (017320);  
392 *Ai9(RCL-tdT)* (007905). We generated the *R26R-FLEX-TVA-2A-RabiesG-2A-tdTomato-FLEX*  
393 (*R26F-RTT*) mouse line for rabies monosynaptic circuit tracing (**Fig. 2A**).

### 394 **Rabies virus retrograde tracing**

395 An intraventricular approach via a Cre-dependent viral strategy was employed to avoid  
396 labeling striatal ChAT<sup>+</sup> neurons. In the beginning we used a monosynaptic circuit tracing with  
397 Rabies strategy<sup>35</sup> by injecting the first virus into LV of *Chat-Cre* mice to express TVA, Rabies-  
398 G protein, and tdTomato in subep-ChAT<sup>+</sup> neurons. The infected subep-ChAT<sup>+</sup> neurons were  
399 later targeted with the second EnvA G-deleted rabies virus to enable efficient mono-synaptic  
400 tracing. It was extremely difficult to infect the same subep-ChAT<sup>+</sup> neurons via two separated  
401 viral injections. To overcome this obstacle, *R26R-FLEX-TVA-2A-RabiesG-2A-tdTomato-FLEX*  
402 (*R26F-RTT*) mice was successfully generated and validated (**Fig. 2A and Extended Figs. 1, 2 &**  
403 **3**). These mice allow for monosynaptic tracing of Cre-targeted neurons via a single EnvA G-  
404 deleted Rabies-eGFP (Salk, USA) or EnvA rVSV-eGFP (EnvA/RABVG-eGFP) (Salk, USA)  
405 viral injections.

#### 406 **Stereotaxic injections**

407 Stereotaxic injections were performed as mice were kept deeply anesthetized in a  
408 stereotaxic frame (David Kopf Instruments) with isoflurane. For circuit tracing, rabies virus, 300  
409 nL of (EnvA G-deleted Rabies-eGFP or EnvA rVSV-eGFP (Salk, USA)) virus were injected into  
410 striatum or lateral ventricle (LV) of P30 *Chat-Cre; R26F-RTT* mice. Viruses were infused  
411 slowly over 10 min into striatum as the following coordinates relative to Bregma (AP: +1, ML  $\pm$   
412 2.0, DV: 2.2 from brain surface) or LV (AP: +0.8, ML  $\pm$  0.65, DV: 2.1 from brain surface) using  
413 a microdriver with a 10  $\mu$ L Hamilton syringe. For electrophysiological testing of Cg1 inputs to  
414 the subep-ChAT<sup>+</sup> neurons (optogenetic-light stimulation), adeno-associated viral viruses were  
415 used for Cre-dependent expression of the excitatory channelrhodopsin. pAAV-CaMKIIa-  
416 hChR2(E123A)-mCherry (addgene #35506) (300nl) virus or pAAV-CaMKIIa-  
417 hChR2(E123T/T159C)-EYFP (addgene #35509) (300nl) virus were injected into P30 *C57BL/6J*

418 or P30 *ChAT-Cre*; *R26F-RTT* mice, respectively. Also, pAAV-Ef1a-DIO  
419 hChR2(E123T/T159C)-mCherry (addgene #35510) (300nl) virus was injected into P30 *VGlut1-*  
420 *Cre*; *ChAT-eGFP* and P28 *Cr-Cre*; *ChAT-eGFP* mice. Viruses were infused slowly over 10 min  
421 into the Cg1 using the following coordinates relative to Bregma (AP: +0.8, ML  $\pm$  0.3, DV: 0.5  
422 from brain surface). For pAAV retrograde tracing, pAAVrg-hSyn-DIO-mCherry (addgene  
423 #50459-AAVrg) and pAAVrg-hSyn-mCherry (addgene # 114472-AAVrg) viruses (300 nl) was  
424 injected into the LV P28 *Cr-Cre*, P30 *C57BL/6J* (P30) and P30 *VGlut1-Cre*. Viruses were  
425 infused slowly over 10 min into the Cg1 as the following coordinates relative to Bregma (AP:  
426 +0.8, ML  $\pm$  0.65, DV: 2.1 from brain surface) .For *in vivo* optogenetic testing of Cg1 inputs to  
427 the subep-ChAT<sup>+</sup> neurons, pAAV-Ef1a-DIO hChR2(E123T/T159C)-mCherry (addgene #35510)  
428 (300nl) and pAAV\_hSyn1-SIO-stGtACR2-FusionRed (addgene #105677) (300nl) viruses were  
429 injected into P28 *Cr-Cre* mice. Viruses were infused slowly over 10 min into the Cg1 (AP: +0.8,  
430 ML  $\pm$  0.25, DV: 0.5 from brain surface).

431 All viruses were infused slowly for over 10 min using a Nanoject (Drummond Scientific)  
432 connected to a glass pipette. The injection pipette was left in place for 10 min post-injection  
433 before it was retracted.

#### 434 **SVZ wholemount preparation and whole-cell patch-clamp recording**

435 For electrophysiology experiments both male and female mice (4- to 10-week-old) were  
436 used. They were anesthetized with isoflurane, transcardially perfused and then ventricular wall  
437 were dissected as SVZ wholemounts in ice-cold NMDG artificial cerebrospinal fluid (ACSF;  
438 containing 92 mM NMDG, 2.5 mM KCl, 1.2 mM NaH<sub>2</sub>PO<sub>4</sub>, 30 mM NaHCO<sub>3</sub>, 20 mM HEPES,  
439 2 mM glucose, 5 mM sodium ascorbate, 2 mM thiourea, 3 mM sodium pyruvate, 10 mM  
440 MgSO<sub>4</sub>, 0.5 mM CaCl<sub>2</sub>), and bubbled with 5% CO<sub>2</sub>/95% O<sub>2</sub>. Tissues were then bubbled in same

441 solution at 37 °C for 15 min, transferred to bubbled, modified-HEPES ACSF at 23–25 °C (92  
442 mM NaCl, 2.5 mM KCl, 1.2 mM NaH<sub>2</sub>PO<sub>4</sub>, 30 mM NaHCO<sub>3</sub>, 20 mM HEPES, 2 mM glucose, 5  
443 mM sodium ascorbate, 2 mM thiourea, 3 mM sodium pyruvate, 2 mM MgSO<sub>4</sub>, 2 mM CaCl<sub>2</sub>) for  
444 at least 45 min before start experimentation. (For NMDG artificial cerebrospinal fluid and  
445 modified-HEPES ACSF solutions, pH was adjusted to 7.5 and osmolarity to 290 mOsm).  
446 Recordings were performed in submerged chamber, superfused with continuously bubbled  
447 ACSF (125 mM NaCl, 2.5 mM KCl, 1.25 mM NaH<sub>2</sub>PO<sub>4</sub>, 26 mM NaHCO<sub>3</sub>, 20 mM glucose, 2  
448 mM CaCl<sub>2</sub>, 1.3 mM MgCl<sub>2</sub>) at 2.5–5 ml/min at 23–25 °C.

449 Patch electrodes with a resistance of 3–6 MΩ were pulled from borosilicate glass  
450 capillaries using a horizontal puller (P-97, Sutter-instruments). All subep-ChAT<sup>+</sup> neurons used in  
451 the electrophysiology recordings were identified by their distinctive morphology from striatal  
452 cholinergic neurons, location (within 15-20 μm from LV surface), their non-spontaneous firing  
453 activity, and their depolarized resting membrane potentials (~-45 mV). For measuring EPSCs  
454 when holding at – 60 mV, the following internal solution was used: 130 mM potassium  
455 gluconate, 2 mM NaCl, 4 mM MgCl<sub>2</sub>, 20 mM HEPES, 4 mM Na<sub>2</sub>ATP, 0.4 mM NaGTP and 0.5  
456 mM EGTA, pH adjusted to 7.2 with KOH. A 40 μM picrotoxin ((124-87-8), Millipore Sigma)  
457 was added in the bath solution in voltage-clamp mode. For measuring inward IPSCs when  
458 holding at – 60 mV, we used internal solution containing K-Cl (high Chloride) KCl (135 Mm),  
459 HEPES (10 mM), Na<sub>2</sub>ATP (2mM), NaGTP (0.2 mM), MgCl<sub>2</sub> (2 mM), and EGTA (0.1 mM), pH  
460 adjusted to 7.2 with KOH. To block glutamatergic transmission, 50 μM DL-AP5 (NMDA  
461 antagonist) ((3693/50), R&D Systems) and 50 μM CNQX (AMPA antagonist) ((0190), Tocris)  
462 were added in the bath solution in voltage-clamp mode. To block action potentials in the patched  
463 cell, the sodium channel blocker QX-314 (10 mM, 552233, Millipore Sigma) was also added.

464 Signals were amplified with Multiclamp 700B (filtered at 10 kHz), digitized with Digidata  
465 1440A (20 kHz), and recorded using pClamp 10 software (Axon). Light-activation of  
466 channelrhodopsin was achieved using a 473-nm laser (X-Cite exacte) through a 40x objective  
467 (Nikon). Action potentials, evoked EPSCs and evoked IPSCs were analyzed using AxoGraph  
468 (AxoGraph). One or two subep-ChAT<sup>+</sup> neurons were recorded per wholemount SVZ. Up to  
469 three neurons from each animal were recorded. Measurements were taken as an average of at  
470 least five responses to obtain a data point.

471 For focal (targeted) photostimulation of local CR<sup>+</sup>-IPSCs from subep-ChAT<sup>+</sup> neurons, we  
472 used Polygon 400 Digital Micromirror Device (Mightex; multiwavelength patterned illuminator)  
473 to control the temporal dynamics (the size, shape, intensity, and position) of light inputs. The  
474 illumination consisted of a 100 ms light pulse (470-nm) at 50% intensity in the selected area (50  
475  $\mu\text{m}$ ). The pulse was triggered using a TTL pulse from the Digidata to synchronize the  
476 stimulation with electrophysiology. Photostimulation was performed for one fluorescent subep-  
477 CR<sup>+</sup> neuron presents in the field of view resulted in postsynaptic effects in the recorded neuron.

#### 478 **Immunofluorescence staining and imaging**

479 Preparation of brain tissue for IHC staining was described previously<sup>25</sup>. We used primary  
480 antibodies to GFP (#GFP-1020, 1:400, AVES lab), Choline Acetyltransferase Antibody  
481 (#AB144P, 1:250, Millipore sigma), tdTomato [16D7] (#EST203, 1:200, Kerafast), RFP (#600-  
482 401-379, 1:250, Rockland), Calretinin (#ab702, 1:200, Abcam), calretinin (#6B3, 1:250, Swant),  
483 Calretinin (#MCA-3G9, 1:250, EnCor Biotechnology), RFP (#ab62341, 1:200, Abcam),  
484 Doublecortin (#AB2253, 1:250, Millipore), Doublecortin (#4604S, 1:200, Cell Signaling  
485 Technology), Doublecortin (#MA5-17066, 1:200, ThermoFisher Scientific), EGFR (phospho

486 Y1068) (#ab5644, 1:250, Abcam), EGFR (phospho Y1068) [Y38] (#ab32430, 1:250, Abcam),  
487 GFAP (#GFAP, 1:500, Aves Labs). In brief, for circuit tracing and *in vivo* optogenetic  
488 experiments, after experiments mice were deeply anesthetized with isoflurane, perfused  
489 transcardially with phosphate buffered saline (PBS), followed by 4% PFA in PBS. The perfused  
490 brains were removed and postfixed overnight at 4°C in 4% PFA. The fixed brains were either cut  
491 into 50 µm coronal sections by Precisionary Instruments VF-500-0Z vibrating microtome or the  
492 SVZ wholemounts were dissected. The coronal slices or SVZ wholemounts were incubated in a  
493 blocking solution containing 5% donkey serum and TBST for 100 min at room temperature. The  
494 sections were then incubated at room temperature overnight in PBS containing 1% donkey serum  
495 and antibodies. They were then washed with PBS and incubated with secondary antibodies,  
496 Alexa-594 (1:1000, LifeTech) or Alexa-488 (1:1000, LifeTech) or Alexa-647 (1:1000, LifeTech)  
497 for 2 h at room temperature, before washing with PBS. The stained sections were counterstained  
498 with a 4',6-diamidino-2-phenylindole solution (DAPI; (D9542) Sigma-Aldrich). After washing  
499 four times with TBST, the sections were coverslipped with Fluoromount (Sigma) aqueous  
500 mounting medium. Images were taken using Leica SP8 upright confocal microscope (Zeiss) with  
501 10 ×, 20 × and 40 × objectives under the control of Zen software (Zeiss). All antibodies used  
502 were validated as in previous publications<sup>25,36</sup> or by publications available on vendor websites  
503 specific to each antibody.

#### 504 ***In vivo* optogenetic stimulation and inhibition**

505 Cannula targeting the Cg1 region was implanted (AP: +0.9, ML ± 0.25, DV: 0.4 from brain  
506 surface) after injecting pAAV-Efla-DIO hChR2(E123T/T159C)-mCherry and pAAV\_hSyn1-  
507 SIO-stGtACR2-FusionRed viruses as described in **Fig. 6A, 7A & 8A**, using implantable mono  
508 fiber-optic fiber (200 µm, 0.22 NA, Doric). Protruding ferrule end of cannula was then connected

509 via fiber cord and a rotary coupling joint (Doric) was used to permit free movement. Three to  
510 four weeks after viral infection, light-stimulation was delivered by TTL control (Master 8,  
511 AMPI) of a 473-nm laser (IkeCool). For *In vivo* optogenetic stimulation, the ipsilateral Cg1  
512 region was stimulated for 10 ms pulses (7-9 mW laser power) at 10 Hz, lasting 10 s, given once  
513 every 1 min. For *In vivo* optogenetic inhibition, the Cg1 regions in ipsilateral and contralateral  
514 sides were continuously stimulated using 3 mW laser power only to study and avoid overheating  
515 in the local cortical areas.

516 For ChAT, DCX, EGFR (phospho Y1068) [Y38], GFAP, CR and RFP analyses, 50- $\mu$ m  
517 brain coronal sections were cut and collected by Precisionary Instruments VF-500-0Z vibrating  
518 microtome or SVZ wholemounts were dissected. The sections or areas surrounding the  
519 activated/inhibited subep-ChAT<sup>+</sup> neurons were selected for analyses.

## 520 ***in vivo* EdU labeling**

521 The 5-ethynyl-2'-deoxyuridine (EdU) staining was conducted using EdU Cell  
522 Proliferation Kit for Imaging (EdU *in vivo* Kits) (baseclick GmbH, Germany) according to the  
523 manufacturer's protocol. EdU was prepared at 50mg/20mL in sterile PBS and used for pulse  
524 labeling of adult mice by performing an intraperitoneal (IP) injection of 500  $\mu$ l dissolved EdU  
525 (50mg/kg). The mice were harvested as described in **Fig. 7 and 8**. The intended coronal slices or  
526 SVZ wholemounts for EdU labeling were first stained for other antibodies, and then  
527 counterstained with DAPI as described in the immunofluorescence staining section.  
528 Subsequently, the sections were washed three times with 3% BSA in PBS. Then, incubated for  
529 30 minutes in a reaction cocktail containing Deionized water, Reaction buffer, Catalyst solution,  
530 Dye Azide and Buffer additive while protected from light. After the reaction cocktail was  
531 removed, sections were washed three times with 3% BSA in PBS. They were then mounted in



532 vectashield mounting media (vector laboratories Inc, Burlingame, CA) and imaged by using  
533 Leica SP8 upright confocal microscope (Zeiss) as above. All steps were carried out at room  
534 temperature.

### 535 **Quantification and Statistical Analysis**

536 All data are expressed as mean  $\pm$  SEM and all statistical analyses were performed using a  
537 GraphPad Prism (version 8) program. Paired and unpaired t-tests were used for analysis of *in*  
538 *vivo* optogenetics stimulation and inhibition studies.  $p < 0.05$  was considered statistically  
539 significant.

540

### 541 **Acknowledgements**

542 We thank Scott Soderling and Shawn Je for helpful comments on the manuscript, Transgenic and  
543 Knockout Mouse Facility at Duke University for assistance with generation of R26R-FLEX-  
544 TVA-2A-RabiesG-2A-tdTomato-FLEX mice, E. Adlaf, J. Erb, B. Asrican, D. Fromme, P. Paez-  
545 Gonzalez, K. Abdi, G. Neves, S. Ramamoorthy, J. David and K. Woldemichael for project  
546 assistance. This work was supported by NIH grant R01MH105416.

547

### 548 **Contributions**

549 M.M.N., C.T.K. and H.H.Y. conceived the project and participated in research design. M.M.N.  
550 performed all experiments and analyzed data. R.R.K. helped with preparation of SVZ  
551 wholemounts for electrophysiology experiments. M.M.N. and H.H.Y wrote the paper.

552

## 553 Reference

- 554 1 Lim, D. A. & Alvarez-Buylla, A. The Adult Ventricular-Subventricular Zone (V-SVZ) and Olfactory  
555 Bulb (OB) Neurogenesis. *Cold Spring Harb Perspect Biol* **8**, doi:10.1101/cshperspect.a018820 (2016).
- 556 2 Ihrie, R. A. & Alvarez-Buylla, A. Lake-front property: a unique germinal niche by the lateral  
557 ventricles of the adult brain. *Neuron* **70**, 674-686, doi:10.1016/j.neuron.2011.05.004 (2011).
- 558 3 Lazarini, F. & Lledo, P. M. Is adult neurogenesis essential for olfaction? *Trends Neurosci* **34**, 20-  
559 30, doi:10.1016/j.tins.2010.09.006 (2011).
- 560 4 Doetsch, F., Caille, I., Lim, D. A., Garcia-Verdugo, J. M. & Alvarez-Buylla, A. Subventricular zone  
561 astrocytes are neural stem cells in the adult mammalian brain. *Cell* **97**, 703-716,  
562 doi:10.1016/s0092-8674(00)80783-7 (1999).
- 563 5 Obernier, K. *et al.* Adult Neurogenesis Is Sustained by Symmetric Self-Renewal and  
564 Differentiation. *Cell Stem Cell* **22**, 221-234 e228, doi:10.1016/j.stem.2018.01.003 (2018).
- 565 6 Codega, P. *et al.* Prospective identification and purification of quiescent adult neural stem cells  
566 from their in vivo niche. *Neuron* **82**, 545-559, doi:10.1016/j.neuron.2014.02.039 (2014).
- 567 7 Lois, C., Garcia-Verdugo, J. M. & Alvarez-Buylla, A. Chain migration of neuronal precursors.  
568 *Science* **271**, 978-981, doi:10.1126/science.271.5251.978 (1996).
- 569 8 Ponti, G., Obernier, K. & Alvarez-Buylla, A. Lineage progression from stem cells to new neurons  
570 in the adult brain ventricular-subventricular zone. *Cell Cycle* **12**, 1649-1650,  
571 doi:10.4161/cc.24984 (2013).
- 572 9 Lois, C. & Alvarez-Buylla, A. Long-distance neuronal migration in the adult mammalian brain.  
573 *Science* **264**, 1145-1148, doi:10.1126/science.8178174 (1994).
- 574 10 Luskin, M. B. Restricted proliferation and migration of postnatally generated neurons derived  
575 from the forebrain subventricular zone. *Neuron* **11**, 173-189, doi:10.1016/0896-6273(93)90281-  
576 u (1993).
- 577 11 Petreanu, L. & Alvarez-Buylla, A. Maturation and death of adult-born olfactory bulb granule  
578 neurons: role of olfaction. *J Neurosci* **22**, 6106-6113, doi:20026588 (2002).
- 579 12 Imayoshi, I. *et al.* Roles of continuous neurogenesis in the structural and functional integrity of  
580 the adult forebrain. *Nat Neurosci* **11**, 1153-1161, doi:10.1038/nn.2185 (2008).
- 581 13 Livneh, Y., Adam, Y. & Mizrahi, A. Odor processing by adult-born neurons. *Neuron* **81**, 1097-  
582 1110, doi:10.1016/j.neuron.2014.01.007 (2014).
- 583 14 Sakamoto, M. *et al.* Continuous postnatal neurogenesis contributes to formation of the olfactory  
584 bulb neural circuits and flexible olfactory associative learning. *J Neurosci* **34**, 5788-5799,  
585 doi:10.1523/JNEUROSCI.0674-14.2014 (2014).
- 586 15 Mak, G. K. & Weiss, S. Paternal recognition of adult offspring mediated by newly generated CNS  
587 neurons. *Nat Neurosci* **13**, 753-758, doi:10.1038/nn.2550 (2010).
- 588 16 Sakamoto, M., Kageyama, R. & Imayoshi, I. The functional significance of newly born neurons  
589 integrated into olfactory bulb circuits. *Front Neurosci* **8**, 121, doi:10.3389/fnins.2014.00121  
590 (2014).
- 591 17 Jones, K. S. & Connor, B. Intrinsic regulation of adult subventricular zone neural progenitor cells  
592 and the effect of brain injury. *Am J Stem Cells* **1**, 48-58 (2012).
- 593 18 Obernier, K. & Alvarez-Buylla, A. Neural stem cells: origin, heterogeneity and regulation in the  
594 adult mammalian brain. *Development* **146**, doi:10.1242/dev.156059 (2019).
- 595 19 Bovetti, S., Gribaudo, S., Puche, A. C., De Marchis, S. & Fasolo, A. From progenitors to integrated  
596 neurons: role of neurotransmitters in adult olfactory neurogenesis. *J Chem Neuroanat* **42**, 304-  
597 316, doi:10.1016/j.jchemneu.2011.05.006 (2011).

- 598 20 Young, S. Z., Taylor, M. M. & Bordey, A. Neurotransmitters couple brain activity to  
599 subventricular zone neurogenesis. *Eur J Neurosci* **33**, 1123-1132, doi:10.1111/j.1460-  
600 9568.2011.07611.x (2011).
- 601 21 Liu, X., Wang, Q., Haydar, T. F. & Bordey, A. Nonsynaptic GABA signaling in postnatal  
602 subventricular zone controls proliferation of GFAP-expressing progenitors. *Nat Neurosci* **8**, 1179-  
603 1187, doi:10.1038/nn1522 (2005).
- 604 22 Hoglinger, G. U. *et al.* Dopamine depletion impairs precursor cell proliferation in Parkinson  
605 disease. *Nat Neurosci* **7**, 726-735, doi:10.1038/nn1265 (2004).
- 606 23 Brezun, J. M. & Daszuta, A. Depletion in serotonin decreases neurogenesis in the dentate gyrus  
607 and the subventricular zone of adult rats. *Neuroscience* **89**, 999-1002, doi:10.1016/s0306-  
608 4522(98)00693-9 (1999).
- 609 24 Banasr, M., Hery, M., Printemps, R. & Daszuta, A. Serotonin-induced increases in adult cell  
610 proliferation and neurogenesis are mediated through different and common 5-HT receptor  
611 subtypes in the dentate gyrus and the subventricular zone. *Neuropsychopharmacology* **29**, 450-  
612 460, doi:10.1038/sj.npp.1300320 (2004).
- 613 25 Paez-Gonzalez, P., Asrican, B., Rodriguez, E. & Kuo, C. T. Identification of distinct ChAT(+)   
614 neurons and activity-dependent control of postnatal SVZ neurogenesis. *Nat Neurosci* **17**, 934-  
615 942, doi:10.1038/nn.3734 (2014).
- 616 26 Oldenburg, I. A. & Ding, J. B. Cholinergic modulation of synaptic integration and dendritic  
617 excitability in the striatum. *Current opinion in neurobiology* **21**, 425-432 (2011).
- 618 27 Fremeau, R. T., Jr. *et al.* The expression of vesicular glutamate transporters defines two classes  
619 of excitatory synapse. *Neuron* **31**, 247-260, doi:10.1016/s0896-6273(01)00344-0 (2001).
- 620 28 Madisen, L. *et al.* A toolbox of Cre-dependent optogenetic transgenic mice for light-induced  
621 activation and silencing. *Nature neuroscience* **15**, 793-802, doi:nn.3078 [pii]  
622 10.1038/nn.3078 (2012).
- 623 29 Lim, S. A., Kang, U. J. & McGehee, D. S. Striatal cholinergic interneuron regulation and circuit  
624 effects. *Front Synaptic Neurosci* **6**, 22, doi:10.3389/fnsyn.2014.00022 (2014).
- 625 30 Beier, K. T., Saunders, A. B., Oldenburg, I. A., Sabatini, B. L. & Cepko, C. L. Vesicular stomatitis  
626 virus with the rabies virus glycoprotein directs retrograde transsynaptic transport among  
627 neurons in vivo. *Front Neural Circuits* **7**, 11, doi:10.3389/fncir.2013.00011 (2013).
- 628 31 Schafer, M. K., Eiden, L. E. & Weihe, E. Cholinergic neurons and terminal fields revealed by  
629 immunohistochemistry for the vesicular acetylcholine transporter. I. Central nervous system.  
630 *Neuroscience* **84**, 331-359, doi:10.1016/s0306-4522(97)00516-2 (1998).
- 631 32 Young, S. Z. *et al.* NKCC1 knockdown decreases neuron production through GABA(A)-regulated  
632 neural progenitor proliferation and delays dendrite development. *J Neurosci* **32**, 13630-13638,  
633 doi:10.1523/JNEUROSCI.2864-12.2012 (2012).
- 634 33 Alfonso, J., Le Magueresse, C., Zuccotti, A., Khodosevich, K. & Monyer, H. Diazepam binding  
635 inhibitor promotes progenitor proliferation in the postnatal SVZ by reducing GABA signaling. *Cell*  
636 *Stem Cell* **10**, 76-87, doi:10.1016/j.stem.2011.11.011 (2012).
- 637 34 Sanai, N. *et al.* Corridors of migrating neurons in the human brain and their decline during  
638 infancy. *Nature* **478**, 382-386, doi:10.1038/nature10487 (2011).
- 639 35 Callaway, E. M. & Luo, L. Monosynaptic Circuit Tracing with Glycoprotein-Deleted Rabies  
640 Viruses. *J Neurosci* **35**, 8979-8985, doi:10.1523/JNEUROSCI.0409-15.2015 (2015).
- 641 36 Benner, E. J. *et al.* Protective astrogenesis from the SVZ niche after injury is controlled by Notch  
642 modulator Thbs4. *Nature* **497**, 369-373, doi:10.1038/nature12069 (2013).

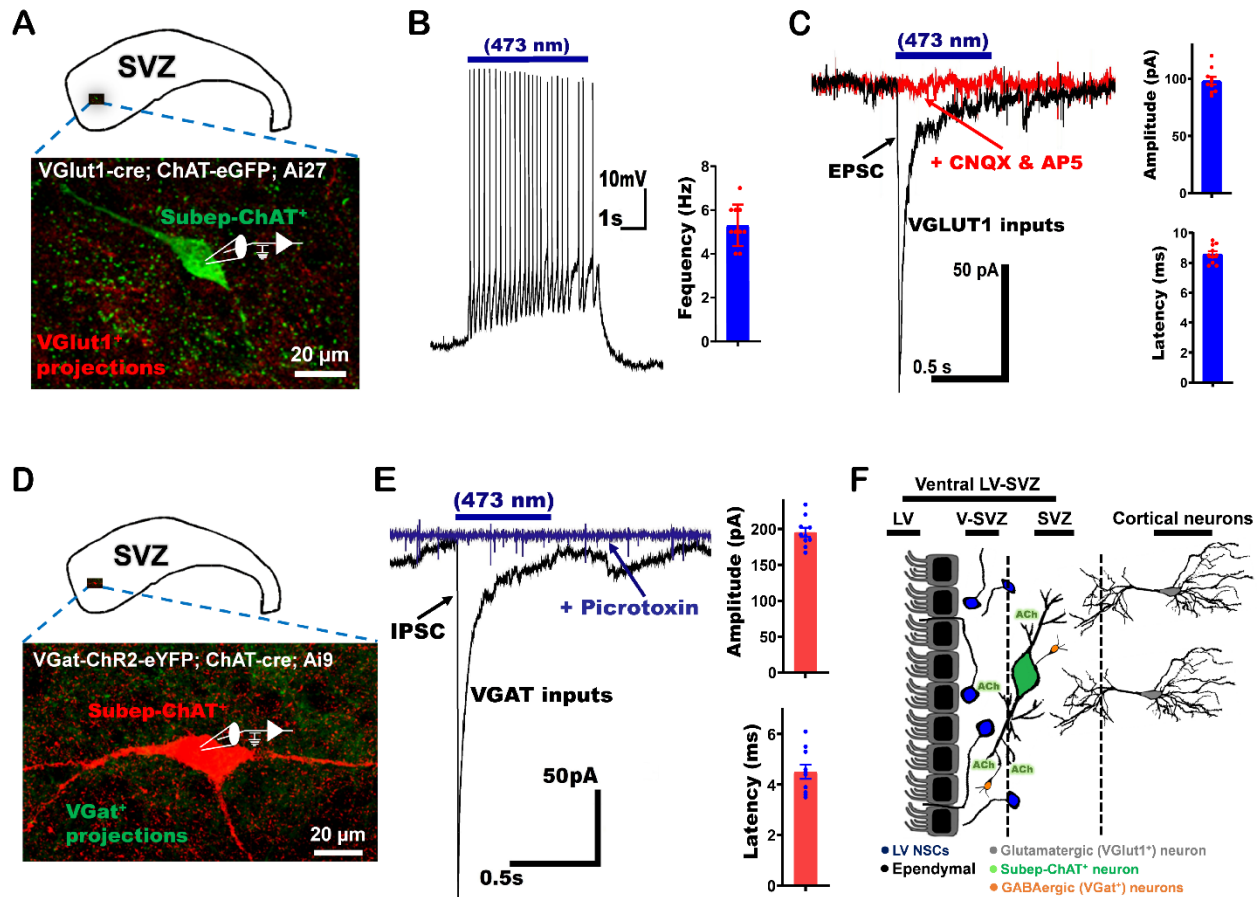

644

645 **Figure 1 Glutamatergic and GABAergic inputs to subep-ChAT<sup>+</sup> neurons.**

646 (A) Illustration of electrophysiological recording of excitatory inputs (VGlut1<sup>+</sup>) to the subep-  
647 ChAT<sup>+</sup> neuron from the wholemount of P30-50 *VGlut1-Cre; ChAT-eGFP; Ai27* mice.

648 (B) Representative trace from whole cell current clamp recording of evoked action potential (APs)  
649 from subep-ChAT<sup>+</sup> neurons upon blue (473nm) light stimulation for 5s (Left). Blue bar = duration  
650 of light stimulation.

651 Average frequency (Right).  $P < 0.0001$ ,  $t_9 = 17.7$ ,  $n = 10$ . Data collected from four *VGlut1-Cre;*  
652 *ChAT-eGFP; Ai27* mice. Each dot represents data from one subep-ChAT<sup>+</sup> neuron.

653 (C) Representative trace of EPSCs that were obtained in whole-cell voltage-clamp recordings from  
654 subep-ChAT<sup>+</sup> neurons after photostimulation for 500ms (black), and the application of AMPA and  
655 NMDA receptors antagonists; CNQX and AP-5, respectively (red) (left). Blue bar = duration of  
656 light stimulation.

657 Average evoked EPSC amplitude and latency (Right).  $P < 0.0001$ ,  $t_9 = 29.1$ ,  $n = 10$  and  $P <$   
658  $0.0001$ ,  $t_9 = 44.2$ ,  $n = 10$ , respectively. Data collected from four *VGlut-Cre; ChAT-eGFP; Ai27*  
659 mice. Each dot represents the amplitude (upper) and latency (lower) of a single Excitatory  
660 Postsynaptic Current (EPSC) recorded from subep-ChAT<sup>+</sup> neuron.

661 (D) Illustration of electrophysiological recording of inhibitory inputs (VGat<sup>+</sup>) to the subep-ChAT<sup>+</sup>  
662 neuron from P30-50 *VGat-ChR2-eYFP; ChAT-Cre; Ai9* mice.

663 (E) Representative trace of electrophysiological recordings of IPSCs that were obtained in whole-  
664 cell recordings from subep-ChAT<sup>+</sup> neurons upon blue (473nm) light stimulation for 500ms (black),  
665 and the application of GABA<sub>A</sub>R antagonist; picrotoxin (blue) (left). Blue bar = duration of light  
666 stimulation. Each dot represents the amplitude (upper) and latency (lower) of a single Inhibitory  
667 Postsynaptic Current (IPSC) recorded from subep-ChAT<sup>+</sup> neuron.

668 Average evoked IPSC amplitude and latency (Right). P value < 0.0001,  $t_9 = 30.4$ , n = 10 and P  
669 value < 0.0001,  $t_9 = 16.1$ , n = 10, respectively. Data collected from four *VGat-ChR2-eYFP; ChAT-*  
670 *cre; Ai9* mice.

671 (F) Schematic representation of presynaptic (excitatory and inhibitory) inputs to the subep-ChAT<sup>+</sup>  
672 neuron.

673 All error bars indicate SEM

674

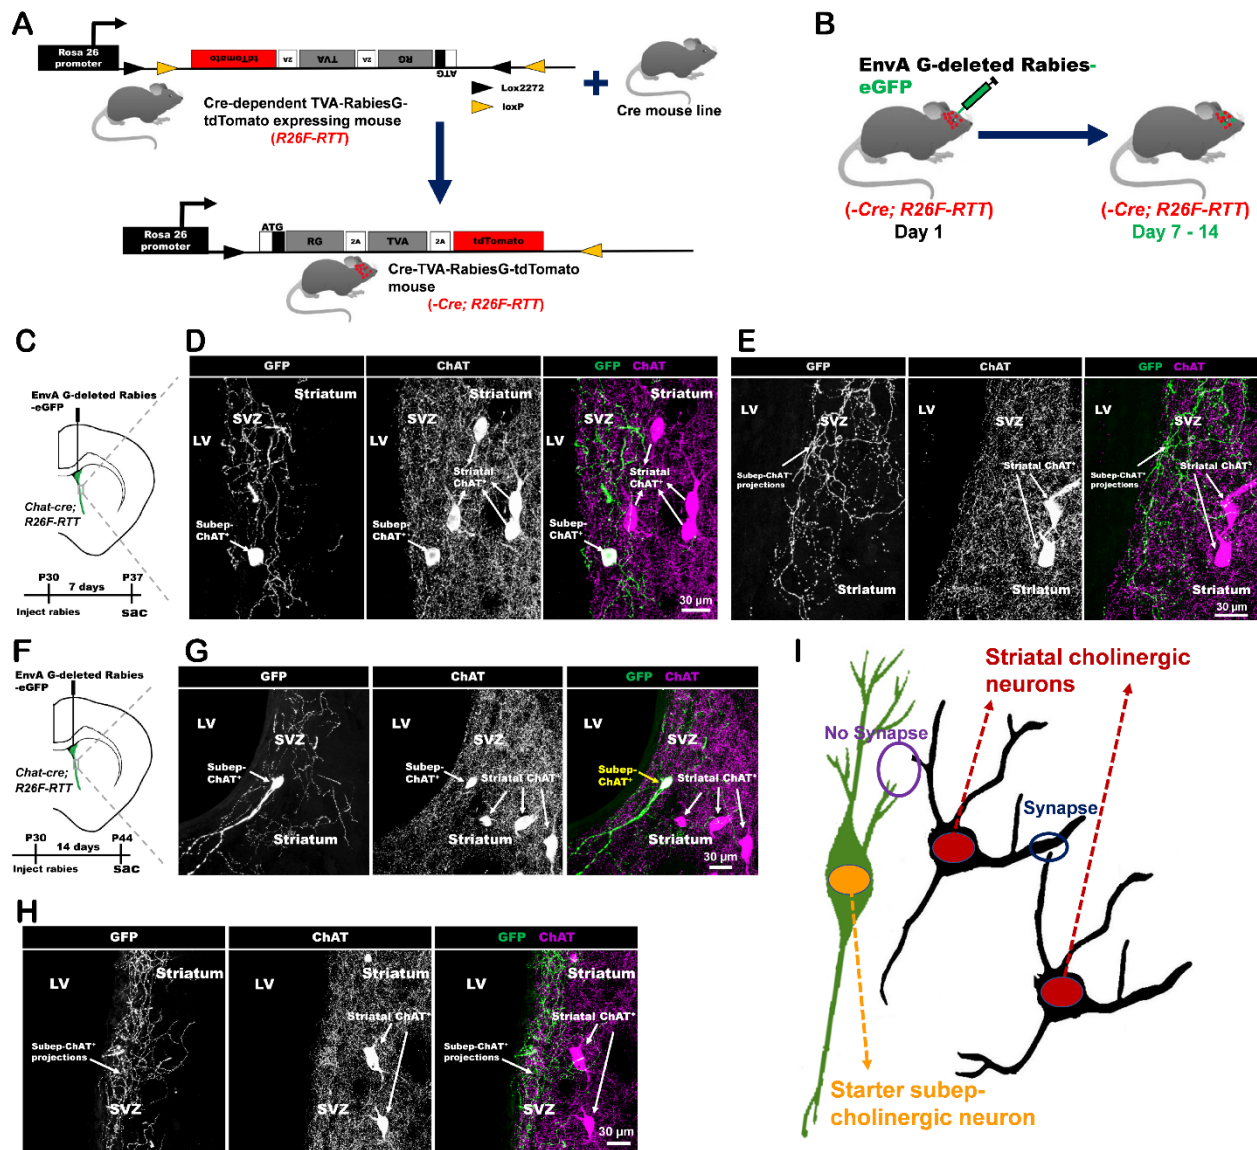

675

676

677 **Figure 2 Rabies virus infection of subep-ChAT<sup>+</sup> neurons.**

678 (A) Schematic representation of *R26R-FLEX-TVA-2A-RabiesG-2A-tdTomato-FLEX* (*R26F-RTT*)  
 679 mice before and after Cre recombinase.

680 (B) Schematic of EnvA G-deleted Rabies-eGFP virus injection into the brain of *-Cre; R26F-RTT*  
 681 mice.

682 (C) Experimental representation of EnvA G-deleted Rabies-eGFP virus injection into lateral  
 683 ventricle (LV) of P30 *Chat-Cre; R26F-RTT* mice. Mice were sacrificed on the day 7 after injection.

684 (D-E) Immunofluorescence staining for GFP (green) and ChAT (red) in SVZ and striatum of  
 685 ipsilateral (injected) side of *Chat-Cre; R26F-RTT* mice (7 days post-injection).

- 686 (F) Experimental representation of EnvA G-deleted Rabies-eGFP virus injection into LV of P30  
687 *Chat-Cre; R26F-RTT* mice. Mice were sacrificed on the day 14 after injection.
- 688 (G-H) Immunofluorescence staining for GFP (green) and ChAT (red) in SVZ and striatum of the  
689 ipsilateral (injected) side of *Chat-Cre; R26F-RTT* mice (14 days post-injection).
- 690 (I) Schematic representation of intra cholinergic connections of striatal cholinergic and subep-  
691 ChAT<sup>+</sup> neurons.

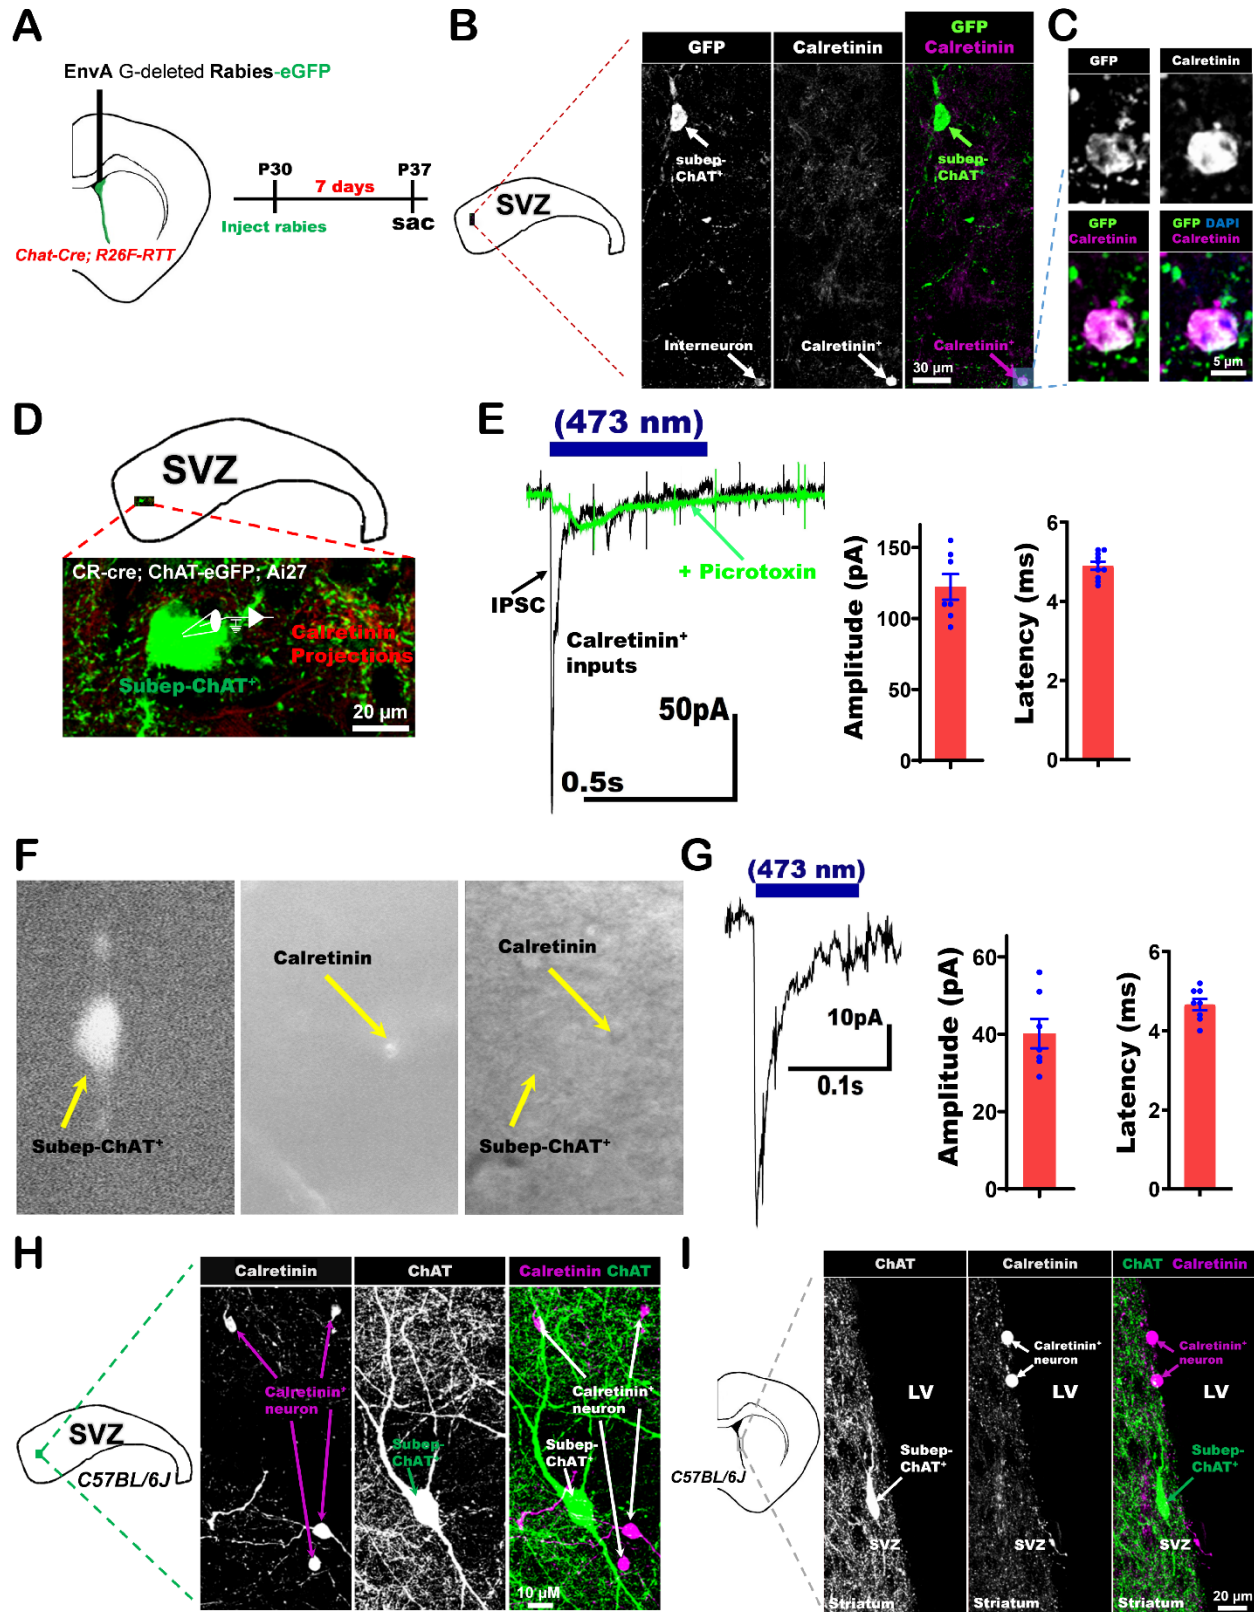

692

693 **Figure 3 Local calretinin-positive (CR<sup>+</sup>) GABAergic interneurons provide inhibitory inputs**  
 694 **to subep-ChAT<sup>+</sup> neurons.**



695 (A) Experimental design of EnvA G-deleted Rabies-eGFP virus injection into LV of P30 *Chat-*  
696 *Cre; R26F-RTT* mice.

697 (B-C) Immunofluorescence staining for GFP (green), Calretinin (purple) and DAPI (blue) in  
698 ipsilateral SVZ wholemount (injected) of P37 *Chat-Cre; R26F-RTT* mice.

699 (D) illustration of electrophysiological recording of calretinin-positive (CR<sup>+</sup>) inhibitory inputs to  
700 the subep-ChAT<sup>+</sup> neurons from SVZ wholemount of P30-50 *Cr-Cre; ChAT-eGFP; Ai27* mice.

701 (E) Representative trace of evoked IPSCs from subep-ChAT<sup>+</sup> neurons upon photostimulation for  
702 500ms (black) and after application of GABA<sub>A</sub>R antagonist picrotoxin (green) (Left). Blue bar =  
703 duration of light stimulation.

704 Average current amplitude and latency of the IPSCs upon stimulation (Right).  $P < 0.0001$ ,  $t_9 =$   
705 19.1,  $n = 10$  and  $P < 0.0001$ ,  $t_9 = 46.9$ ,  $n = 10$ , respectively. Data collected from five *Cr-Cre;*  
706 *ChAT-eGFP; Ai27* mice. Each dot represents the amplitude (left) and latency (right) of a single  
707 Inhibitory Postsynaptic Current (EPSC) recorded from subep-ChAT<sup>+</sup> neuron.

708 (F) Representation of subep-ChAT<sup>+</sup> neuron recording from SVZ wholemount of P30-50 *Cr-Cre;*  
709 *ChAT-eGFP; Ai27* mice. Left; subep-ChAT<sup>+</sup> neuron (473nm light). Middle; Subep-CR<sup>+</sup> neurons  
710 (590nm light). Right; bright field image showing both subep-ChAT<sup>+</sup> and -CR<sup>+</sup> neurons.

711 (G) Representative trace of evoked IPSCs in subep-ChAT<sup>+</sup> neurons following photostimulation  
712 for 100ms (Left). Blue bar = duration of light stimulation.

713 Average current amplitude and latency of the IPSCs upon stimulation (Right).  $P < 0.0001$ ,  $t_7 =$   
714 12.25,  $n = 8$  and  $P < 0.0001$ ,  $t_9 = 32.4$ ,  $n = 8$ , respectively. Data collected from three *Cr-Cre;*  
715 *ChAT-eGFP; Ai27* mice. Each dot represents the amplitude (left) and latency (right) of an  
716 Inhibitory Postsynaptic Current (EPSC) recorded from subep-ChAT<sup>+</sup> neuron.

717 (H-I) Immunofluorescence staining for CR (purple) and ChAT (green) in the SVZ wholemount  
718 (H) and coronal section (I) of P28 *C57BL/6J* mice.

719 All error bars indicate SEM.

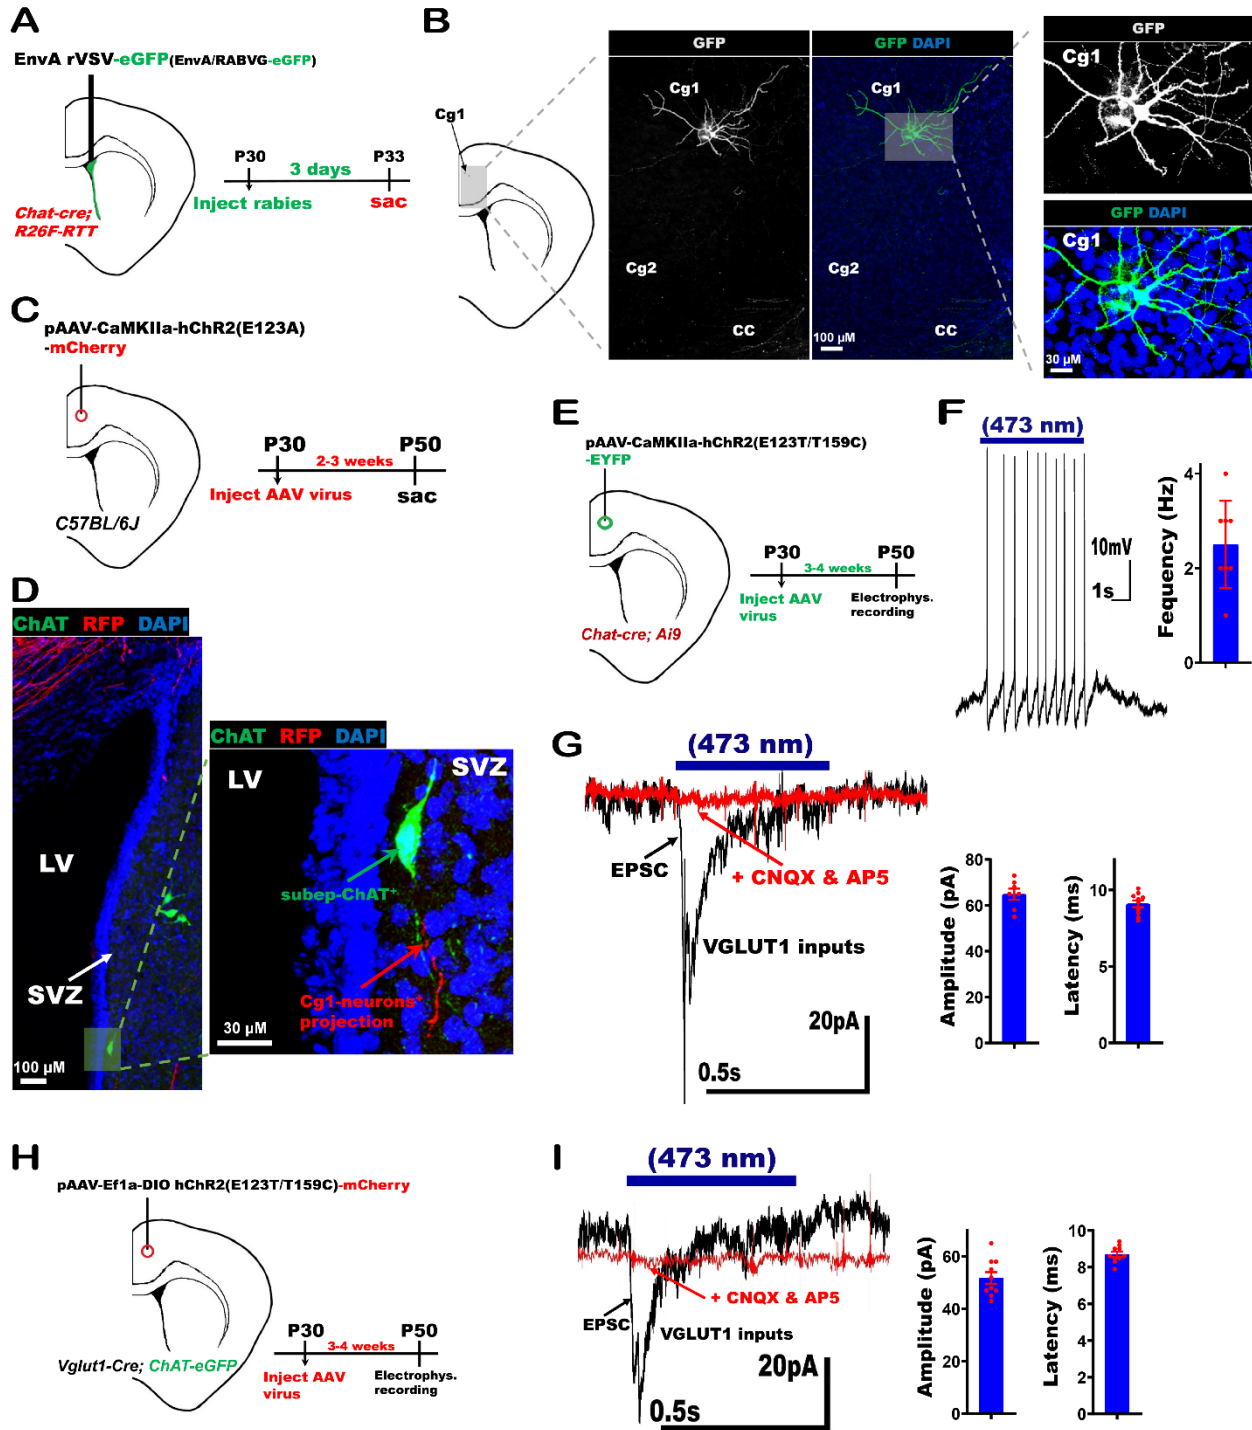

720

721 **Figure 4 Anterior cingulate cortex projects directly to subep-ChAT<sup>+</sup> neurons.**

722

723 (A) Schematic illustration of EnvA rVSV-eGFP (EnvA/RABVG-eGFP) virus injection into LV of  
 724 P30 *Chat-Cre; R26F-RTT* mice.

725

726 (B) A sample of immunofluorescence staining for GFP (green) in anterior cingulate cortex areas  
727 1 and 2 (Cg1 and Cg2) (left) and Cg1 region (right) of ipsilateral (injected) side of P33 *Chat-Cre*;  
728 *R26F-RTT* mice.

729  
730 (C) Schematic representation of AAV-CaMKII-hChR2(E123A)-mCherry virus injection into Cg1  
731 region of P30 *C57BL/6J* mice.

732  
733 (D) A sample of immunofluorescence staining for ChAT (green) and infected projections (red) of  
734 the ipsilateral Cg1 neurons (injected side) in striatum and SVZ (left), and SVZ (right) of P50  
735 *C57BL/6J* mice in panel C.

736  
737 (E) Experimental design of pAAV-Efla-DIO hChR2(E123T/T159C)-EYFP virus injection into  
738 Cg1 region of P30 *Chat-Cre; Ai9* mice. Mice were used for recording 3-4 weeks post-injection.

739  
740 (F) Representative trace of whole cell current clamp recording of evoked action potentials (APs)  
741 from subep-ChAT<sup>+</sup> neurons upon photo-stimulation for 5s (Left). Blue bar = duration of light  
742 stimulation.

743 Average spike frequency (Right).  $P < 0.0001$ ,  $t_7 = 7.6$ ,  $n = 8$ . Data collected from five *Chat-Cre*;  
744 *Ai9* mice. Each dot represents data from one subep-ChAT<sup>+</sup> neuron.

745  
746 (G) Representative trace of EPSCs were obtained in whole-cell recordings from subep-ChAT<sup>+</sup>  
747 neurons upon 473nm light stimulation for 500ms (black), and after blocking with AMPA and  
748 NMDA receptors antagonists (CNQX and AP-5, respectively) (red) (Left). Blue bar = duration of  
749 light stimulation.

750 Average EPSC amplitude and latency (Right).  $P$  value  $< 0.0001$ ,  $t_9 = 36.16$ ,  $n = 10$  and  $P$  value  $<$   
751  $0.0001$ ,  $t_9 = 40.5$ ,  $n = 10$ , respectively. Data collected from five *Chat-Cre; Ai9* mice. Each dot  
752 represents the amplitude (left) and latency (right) of a single Excitatory Postsynaptic Current  
753 (EPSC) recorded from subep-ChAT<sup>+</sup> neuron.

754  
755 (H) Experimental design of pAAV-Efla-DIO hChR2(E123T/T159C)-mCherry virus injection into  
756 Cg1 region of P30 *VGlut1-Cre; ChAT-eGFP* mice. Mice were used for recording at 3-4 weeks  
757 post-injection.

758  
759 (I) Representative trace of EPSCs were obtained in whole-cell voltage-clamp recordings from  
760 subep-ChAT<sup>+</sup> neurons upon 473nm light stimulation for 500ms (black), and after blocking with  
761 AMPA and NMDA receptors antagonists (CNQX and AP-5, respectively) (red) (Left). Blue bar =  
762 duration of light stimulation.

763 Average evoked EPSC amplitude and latency (Right).  $P$  value  $< 0.0001$ ,  $t_9 = 23.3$ ,  $n = 10$  and  $P$   
764 value  $< 0.0001$ ,  $t_9 = 61.2$ ,  $n = 10$ , respectively. Data collected from four *VGlut1-Cre; ChAT-eGFP*  
765 mice. Each dot represents the amplitude (left) and latency (right) of a single Excitatory Post  
766 Synaptic Current (EPSC) recorded from subep-ChAT<sup>+</sup> neuron.

767  
768 All error bars indicate SEM.

769

770

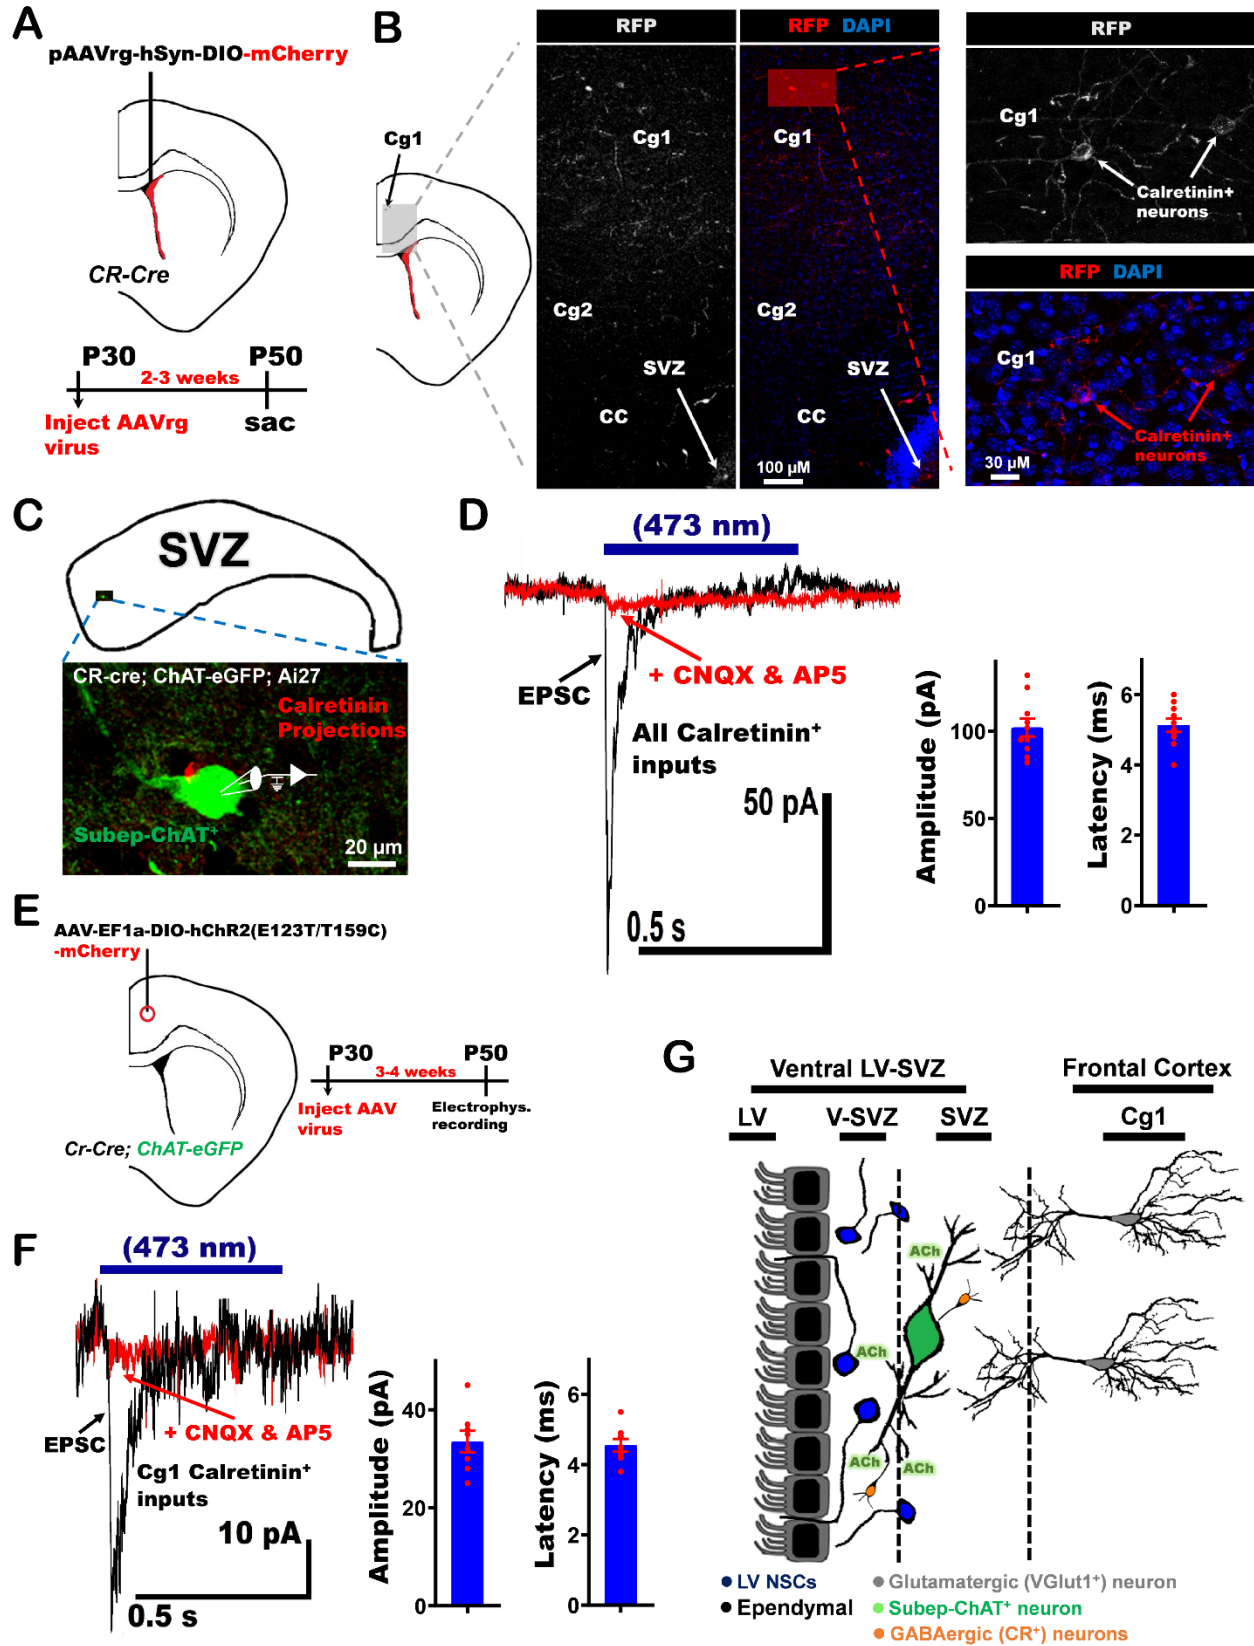

772 **Figure 5 Presynaptic cingulate neurons that excite subep-ChAT<sup>+</sup> neurons are calretinin-**  
773 **positive (CR<sup>+</sup>).**

774

775 (A) Schematic illustration of the experimental design of pAAVrg-hSyn-DIO-mCherry virus  
776 injection into LV of P28 *Cr-Cre* mice.

777

778 (B) Immunofluorescence staining for RFP (red) in ipsilateral (injected side) anterior cingulate  
779 cortex areas 1 and 2 (Cg1 and Cg2) (left) and ipsilateral (injected side) Cg1 region (right) of P50  
780 *Cr-Cre* mice.

781

782 (C) Illustration of electrophysiological recording of calretinin-positive (CR<sup>+</sup>) excitatory inputs to  
783 subep-ChAT<sup>+</sup> neurons from SVZ wholemount of P30-50 *Cr-Cre; ChAT-eGFP; Ai27* mice.

784

785 (D) Representative trace of EPSCs were obtained in whole-cell recordings from subep-ChAT<sup>+</sup>  
786 neurons upon 473nm light stimulation for 500ms (black), and after blocking with AMPA and  
787 NMDA receptors antagonists (CNQX and AP-5, respectively) (red) (Left). Blue bar = duration of  
788 light stimulation.

789 Average EPSC amplitude and latency (Right).  $P < 0.0001$ ,  $t_9 = 19.6$ ,  $n = 10$  and  $P < 0.0001$ ,  $t_9 =$   
790  $27$ ,  $n = 10$ , respectively. Data collected from five *Cr-Cre; ChAT-eGFP; Ai27* mice. Each dot  
791 represents the amplitude (left) and latency (right) of a single Excitatory Postsynaptic Current  
792 (EPSC) recorded from subep-ChAT<sup>+</sup> neuron.

793

794 (E) Experimental design of AAV-EF1a-DIO-hChR2(E123T/T159C)-mCherry virus injection into  
795 Cg1 of P28 *Cr-Cre; ChAT-eGFP* mice. Mice were used for recording 3-4 weeks post-injection.

796

797 (F) Representative trace of EPSCs evoked specifically by Cg1 CR<sup>+</sup> input. EPSCs were recorded  
798 from subep-ChAT<sup>+</sup> neurons of injected mice in panel E upon 473nm light stimulation for 500ms  
799 (black). EPSCs were blocked by CNQX and AP-5 (red) (Left).

800 An average current amplitude and latency (Right).  $P < 0.0001$ ,  $t_7 = 15.3$ ,  $n = 8$  and  $P < 0.0001$ ,  $t_7$   
801  $= 24.9$ ,  $n = 8$ , respectively. Data collected from four *Cr-Cre; ChAT-eGFP* mice. Each dot  
802 represents the amplitude (left) and latency (right) of a single Excitatory Postsynaptic Current  
803 (EPSC) recorded from subep-ChAT<sup>+</sup> neuron.

804

805 (G) Schematic summary of (Cg1-Subep-ChAT<sup>+</sup>) circuit regulation of LV NSCs.

806

807 All error bars indicate SEM.

808

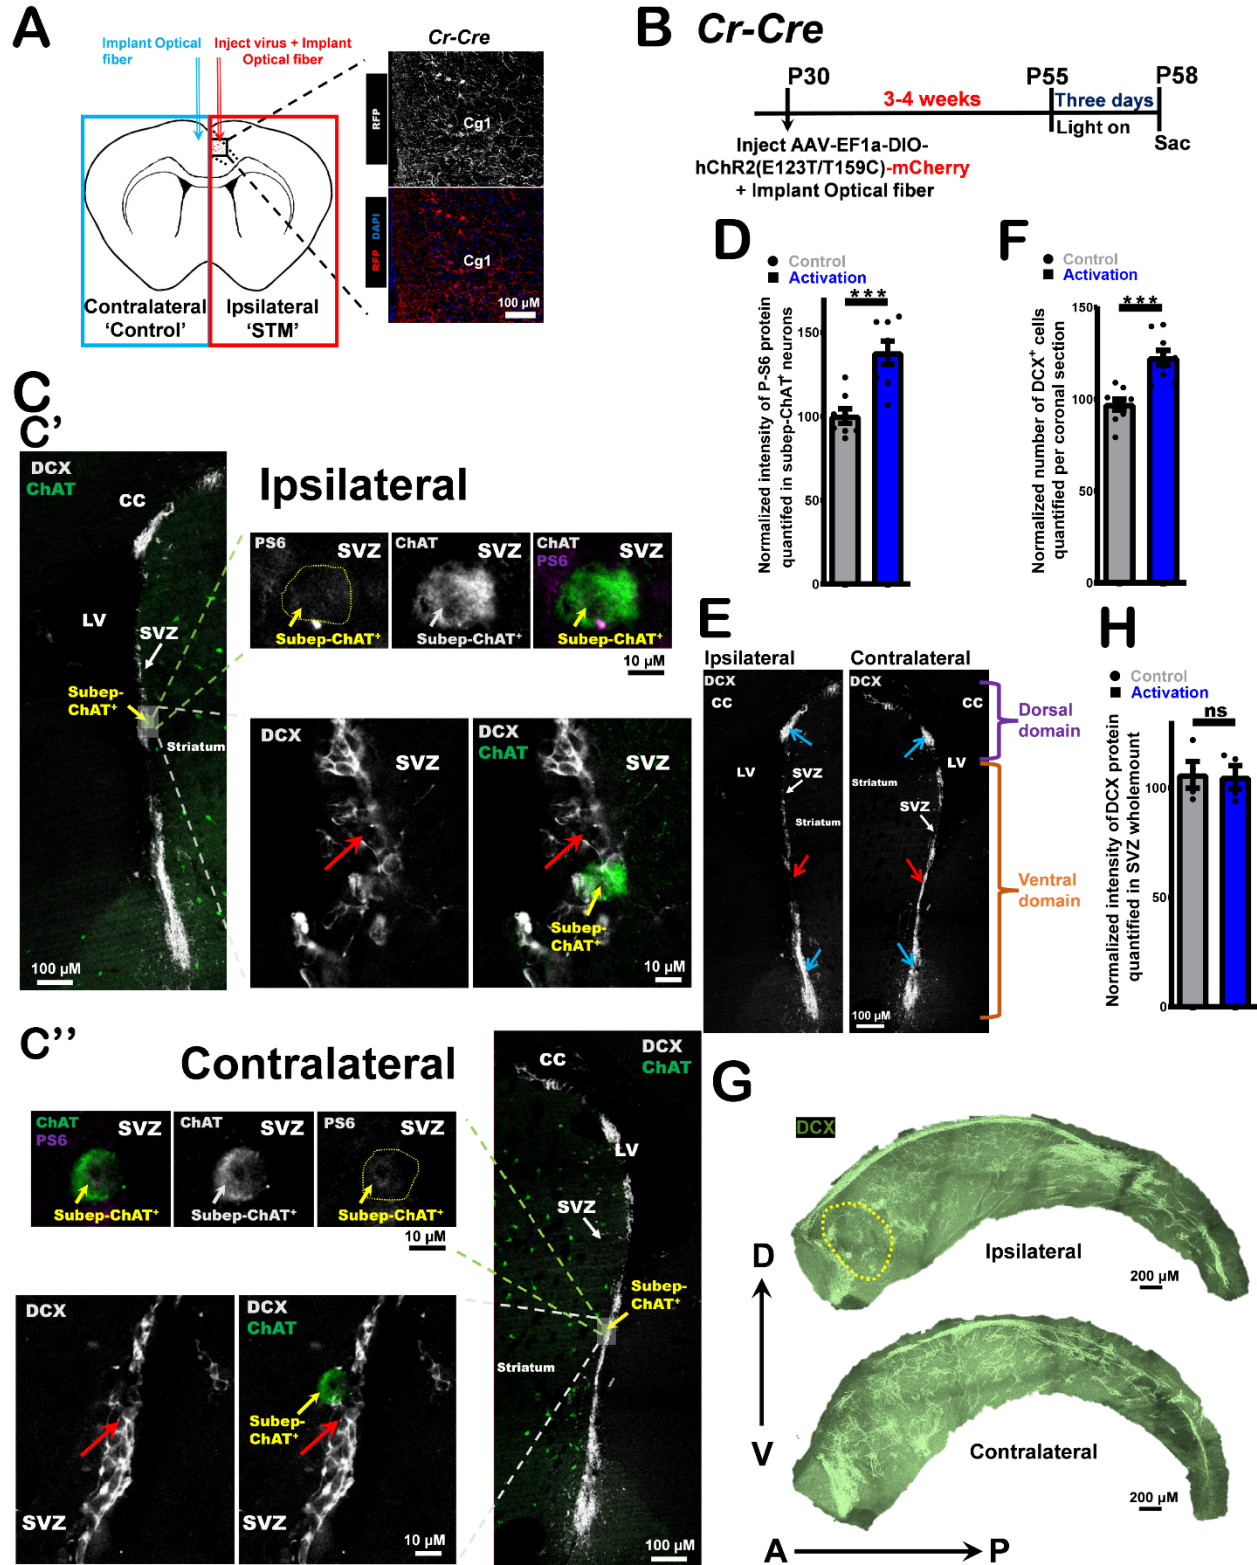

809  
810  
811  
812

**Figure 6** *In vivo* optogenetic (Cg1-subep-ChAT<sup>+</sup>) circuit stimulation modulates neurogenesis in the SVZ niche.

- 813 (A) Schematic representation of *in vivo* optogenetic stimulation experiment in panel B.  
814 Immunofluorescence staining for RFP (red) in the ipsilateral (injected) Cg1 of *Cr-Cre* mice.
- 815 (B) Experimental design of *in vivo* optogenetic stimulation for three days post AAV-EF1a-DIO-  
816 hChR2(E123T/T159C)-mCherry virus injection into ipsilateral Cg1 and optical fibers  
817 implantation into Cg1 regions of P28 *Cr-Cre* mice
- 818 (C) DCX (grey) and ChAT (green) immunofluorescence staining of (C') ipsilateral (upper images;  
819 activation) vs. (C'') contralateral (lower images; control) sides of SVZ from stimulated coronal  
820 sections of mice in panel B. Identical settings from same brain section were used for imaging. Red  
821 arrows represent DCX<sup>+</sup> neuroblasts around subep-ChAT<sup>+</sup> neurons.
- 822 (D) P-S6 intensity analysis of subep-ChAT<sup>+</sup> neurons in ipsilateral side (activation) vs. contralateral  
823 side (control).  $P < 0.0004$ ,  $n=8$ , Paired t-test. Data collected from three stimulated *Cr-Cre* mice.  
824 Each dot represents a subep-ChAT<sup>+</sup> neuron.
- 825 (E) DCX (grey) immunofluorescence staining of ipsilateral SVZ (left image; activation) vs.  
826 contralateral SVZ (right image; control) from stimulated coronal section of mice in panel C.  
827 Identical settings from same brain section were used for imaging. Blue arrows display DCX<sup>+</sup>  
828 neuroblasts in dorsal (upper) and ventral (lower) domains. Red arrow displays DCX<sup>+</sup> neuroblasts  
829 adjacent to subep-ChAT<sup>+</sup> neurons in ventral domain of the stimulated SVZ (left) and control SVZ  
830 (right).
- 831 (F) Analysis of DCX<sup>+</sup> neuroblasts in stimulated coronal sections of ipsilateral side (activation) vs.  
832 contralateral side (control).  $P < 0.0001$ ,  $n=9$ , Paired t-test. Data collected from four stimulated *Cr-*  
833 *Cre* mice. Each dot represents a total DCX<sup>+</sup> cells per coronal section.
- 834 (G) DCX (green) immunofluorescence staining of ipsilateral (upper images; activation) vs.  
835 contralateral (lower images; control) of SVZ wholemount from stimulated mice in panel B.  
836 Identical settings from same brain wholemounts were used for imaging. Yellow dotted circle  
837 represents an area where subep-ChAT<sup>+</sup> neurons mainly reside in the ventral region of SVZ.
- 838 (H) Analysis of DCX intensity in ipsilateral SVZ wholemount (activation) vs. contralateral SVZ  
839 wholemount (control).  $P = 0.766$  (ns),  $n=4$ , Paired t-test. Data collected from four stimulated *Cr-*  
840 *Cre* mice. Each dot represents a total DCX protein per SVZ wholemount.
- 841 All error bars indicate SEM.

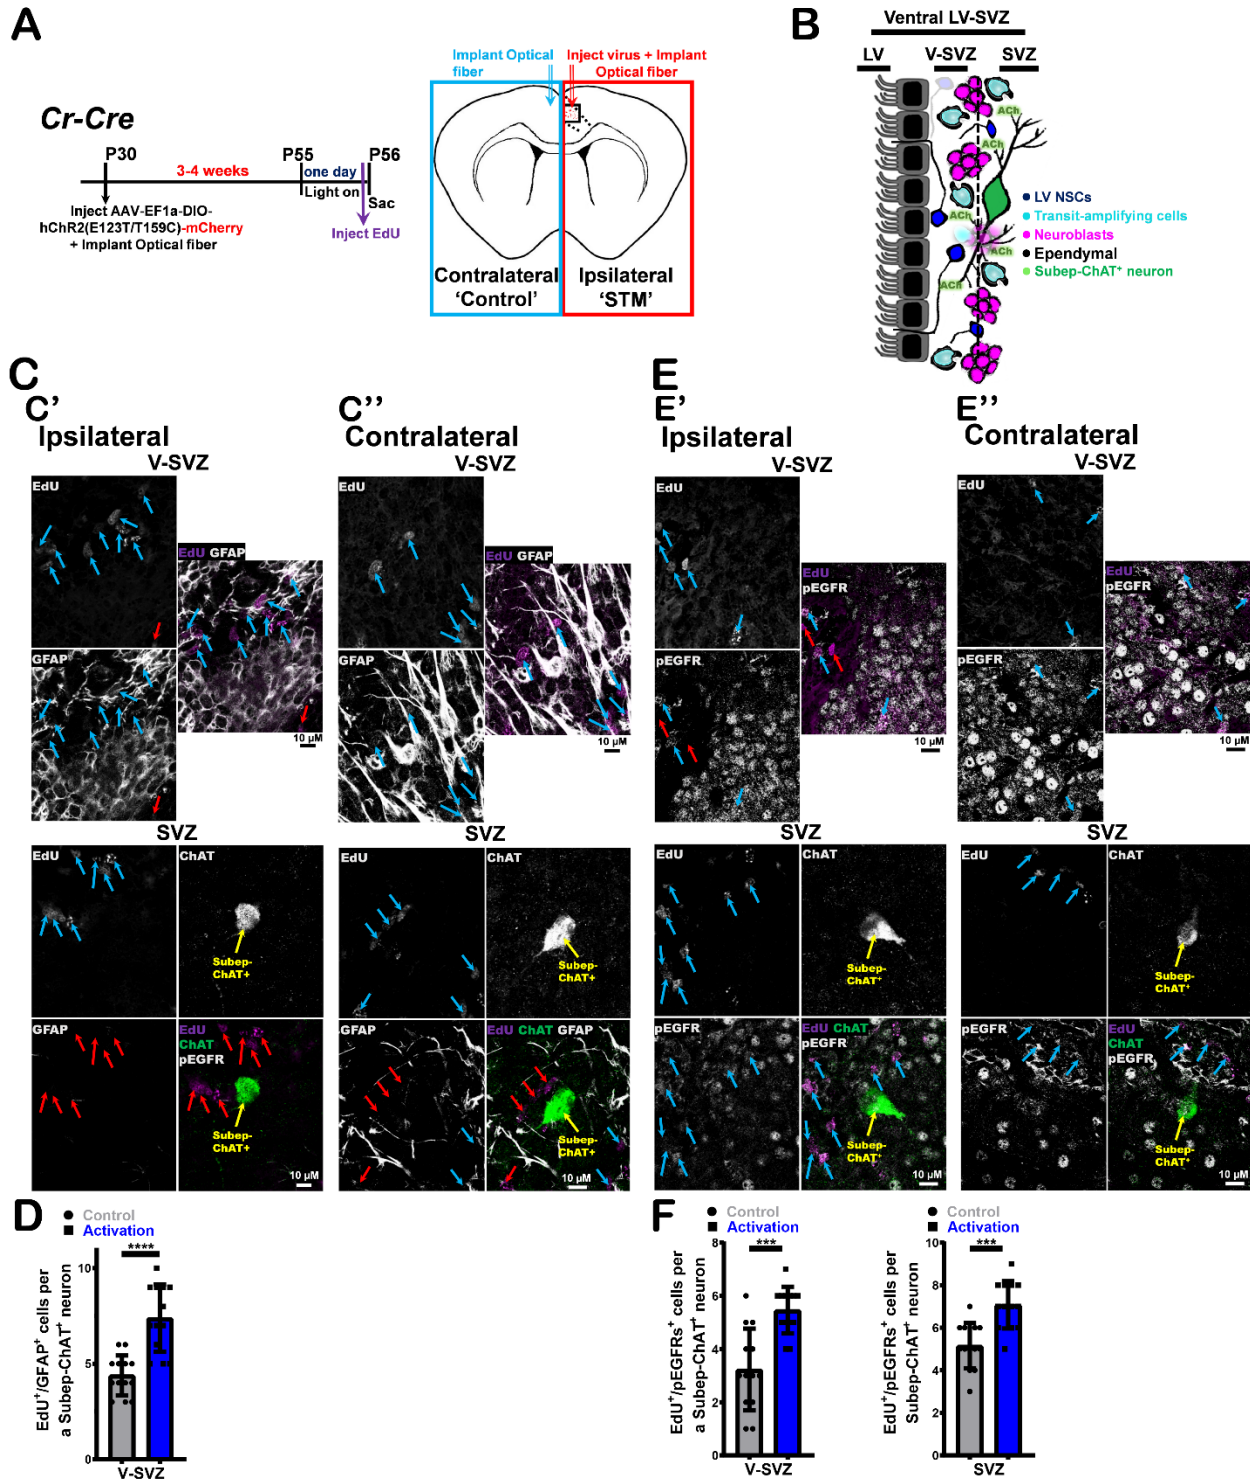

842  
843

844 **Figure 7 *In vivo* optogenetic (Cg1-subep-ChAT<sup>+</sup>) circuit stimulation modulates cellular**  
845 **proliferation in the SVZ niche.**

846 (A) Experimental design of *in vivo* optogenetic stimulation for one day post AAV-EF1a-DIO-  
847 hChR2(E123T/T159C)-mCherry virus injection into ipsilateral Cg1 and optical fibers  
848 implantation into Cg1 regions of P28 *Cr-Cre* mice



849 (B) Schematic representation of the cellular composition and organization of the LV-SVZ.

850 (C) EdU (purple), ChAT (green) and GFAP (grey) immunofluorescence staining of (C') ipsilateral  
851 SVZ wholemount (activation) (upper images; V-SVZ and lower images; SVZ) vs. (C'')  
852 contralateral SVZ wholemount (control) (upper images; V-SVZ and lower images; SVZ) from  
853 stimulated mice in panel A. Identical settings from same brain section were used for imaging. Blue  
854 arrows display EdU<sup>+</sup>/GFAP<sup>+</sup> cells surrounding subep-ChAT<sup>+</sup> neurons in V-SVZ. Red arrows  
855 display EdU<sup>+</sup>/GFAP<sup>-</sup> cells surrounding subep-ChAT<sup>+</sup> neurons in V-SVZ and SVZ.

856 (D) Analysis of EdU<sup>+</sup>/GFAP<sup>+</sup> cells in ipsilateral (activation) V-SVZ vs. contralateral (control) V-  
857 SVZ of SVZ wholemounts.  $P < 0.0001$ ,  $n=13$ , Unpaired t-test. Data collected from four stimulated  
858 *Cr-Cre* mice. Each dot represents total EdU<sup>+</sup>/GFAP<sup>+</sup> cells surrounding a subep-ChAT<sup>+</sup> neuron.

859 (E) EdU (purple), ChAT (green) and pEGFR (grey) immunofluorescence staining of (E')  
860 ipsilateral SVZ wholemount (activation) (upper images; V-SVZ and lower images; SVZ) vs. (E'')  
861 contralateral SVZ wholemount (control) (upper images; V-SVZ and lower images; SVZ) from  
862 stimulated mice in panel A. Identical settings from same brain section were used for imaging. Blue  
863 arrows display EdU<sup>+</sup>/pEGFR<sup>+</sup> cells surrounding subep-ChAT<sup>+</sup> neurons in V-SVZ and SVZ. Red  
864 arrows display EdU<sup>+</sup>/pEGFR<sup>-</sup> cells surrounding subep-ChAT<sup>+</sup> neurons in V-SVZ.

865 (F) Left: Analysis of EdU<sup>+</sup>/pEGFR<sup>+</sup> cells in ipsilateral (activation) V-SVZ vs. contralateral  
866 (control) V-SVZ of SVZ wholemounts.  $P = 0.0001$ ,  $n=13$ , Unpaired t-test. Data collected from  
867 four stimulated *Cr-Cre* mice. Each dot represents total EdU<sup>+</sup>/pEGFR<sup>+</sup> cells surrounding a subep-  
868 ChAT<sup>+</sup> neuron.

869 Right: Analysis of EdU<sup>+</sup>/pEGFR<sup>+</sup> cells in ipsilateral (activation) SVZ vs. contralateral (control)  
870 SVZ of SVZ wholemounts.  $P = 0.0002$ ,  $n=13$ , Unpaired t-test. Data collected from four stimulated  
871 *Cr-Cre* mice. Each dot represents total EdU<sup>+</sup>/pEGFR<sup>+</sup> cells surrounding a subep-ChAT<sup>+</sup> neuron.

872 All error bars indicate SEM.

873

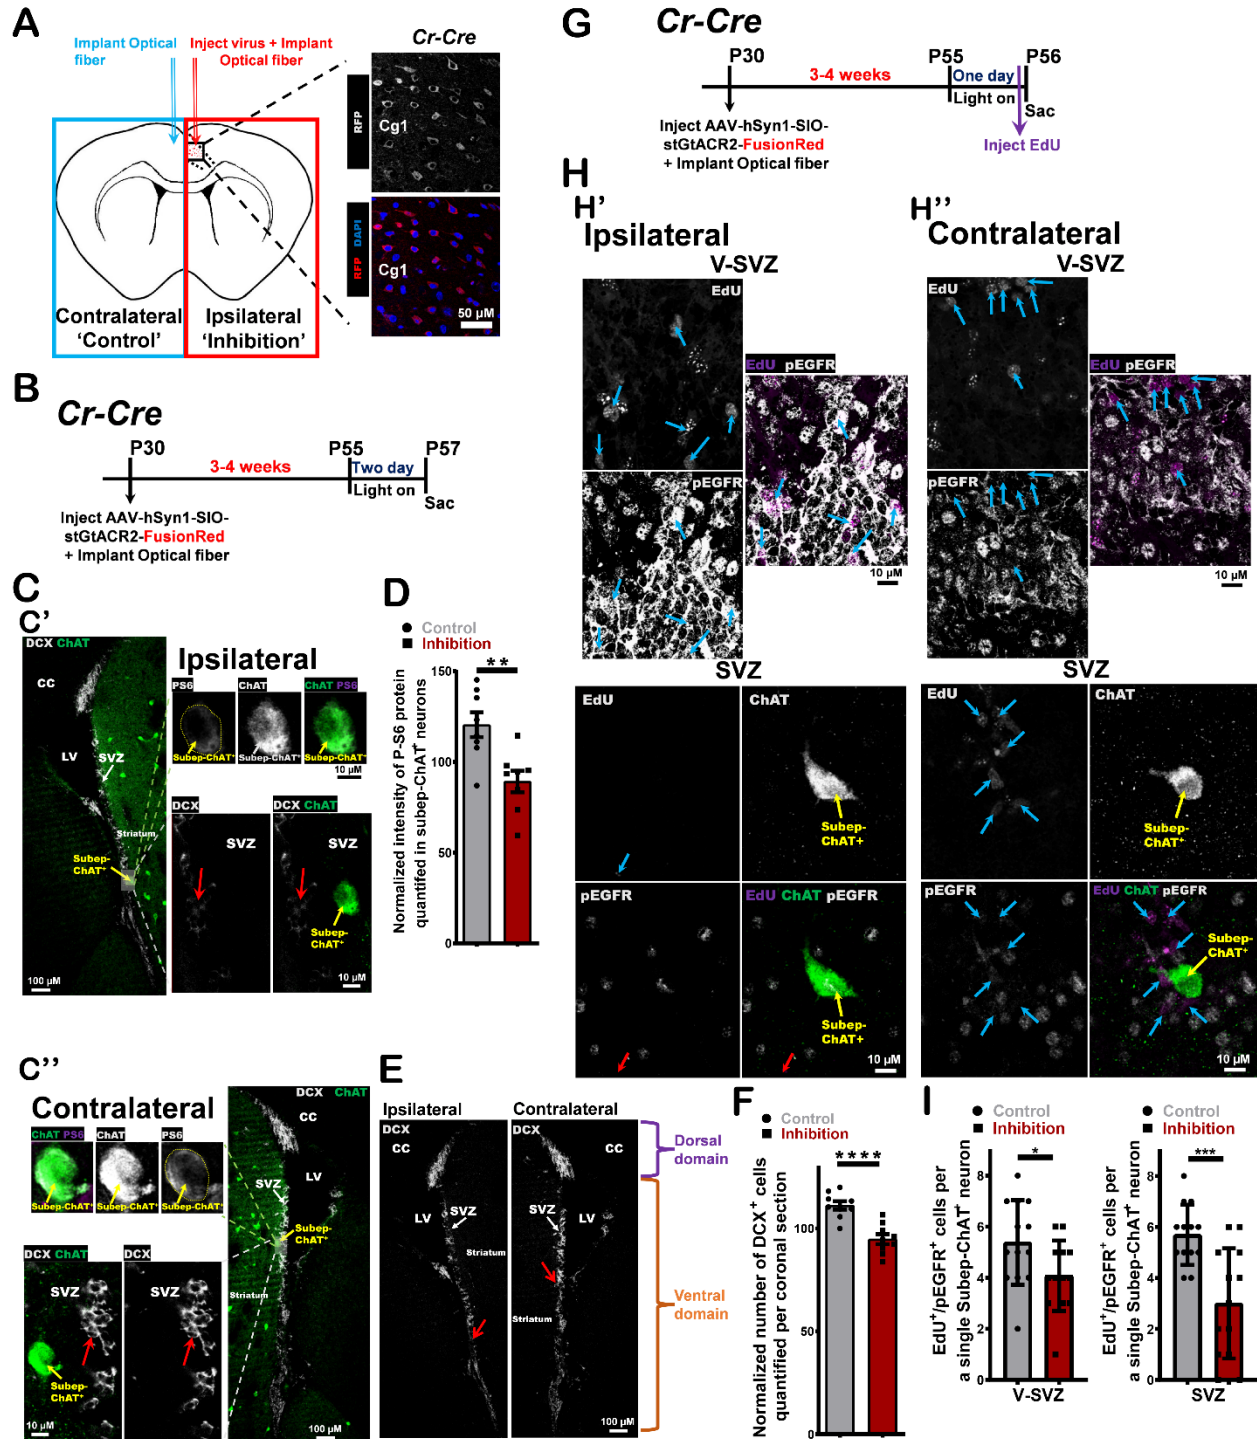

874  
875

876 **Figure 8 *In vivo* optogenetic (Cg1-subep-ChAT<sup>+</sup>) circuit inhibition modulates neurogenesis**  
877 **and cellular proliferation in the SVZ niche.**

878 (A) Schematic representation of *in vivo* optogenetic inhibition experiment in panel B.  
879 Immunofluorescence staining for RFP (red) in ipsilateral (injected) Cg1 of *Cr-Cre* mice.

880

881 (B) Experimental design of *in vivo* optogenetic inhibition for two days post AAV\_hSyn1-SIO-  
882 stGtACR2-FusionRed virus injection into ipsilateral Cg1 and optical fibers implantation into Cg1  
883 regions of P28 *Cr-Cre* mice.

884 (C) DCX (grey) and ChAT (green) immunofluorescence staining of (C') ipsilateral (upper images;  
885 inhibition) vs. (C'') contralateral (lower images; control) sides of SVZ from stimulated coronal  
886 sections of mice in panel B. Identical settings from same brain section were used for imaging. Red  
887 arrows represent DCX<sup>+</sup> neuroblasts around subep-ChAT<sup>+</sup> neurons.

888 (D) P-S6 intensity analysis of subep-ChAT<sup>+</sup> neurons in ipsilateral side (inhibition) vs. contralateral  
889 side (control). P = 0.0038, n=8, Paired t-test. Data collected from three stimulated *Cr-Cre* mice.  
890 Each dot represents a Subep-ChAT<sup>+</sup> neuron.

891 (E) DCX (grey) immunofluorescence staining of ipsilateral SVZ (left image; inhibition) vs.  
892 contralateral SVZ (right image; control) from stimulated coronal section of mice in panel C.  
893 Identical settings from same brain section were used for imaging. Red arrow displays DCX<sup>+</sup> cells  
894 adjacent to subep-ChAT<sup>+</sup> neurons in ventral domain of the stimulated and control sides.

895 (F) Analysis of DCX<sup>+</sup> cells in stimulated coronal sections of ipsilateral side (inhibition) vs.  
896 contralateral side (control). P<0.0001, n=9, Paired t-test. Data collected from four stimulated *Cr-*  
897 *Cre* mice. Each dot represents a total DCX<sup>+</sup> cells per coronal section.

898 (G) Experimental design of *in vivo* optogenetic inhibition for one day post AAV\_hSyn1-SIO-  
899 stGtACR2-FusionRed virus injection into ipsilateral Cg1 and optical fiber implantation into Cg1  
900 regions of P28 *Cr-Cre* mice.

901 (H) EdU (purple), ChAT (green) and pEGFR (grey) immunofluorescence staining of (H')  
902 ipsilateral SVZ wholemount (inhibition) (upper images; V-SVZ and lower images; SVZ) vs. (H'')  
903 contralateral SVZ wholemount (control) (upper images; V-SVZ and lower images; SVZ) from  
904 stimulated mice in panel G. Identical settings from same brain section were used for imaging. Blue  
905 arrows display EdU<sup>+</sup>/pEGFR<sup>+</sup> cells surrounding subep-ChAT<sup>+</sup> neurons in V-SVZ and SVZ. Red  
906 arrows display EdU<sup>+</sup>/pEGFR<sup>-</sup> cells surrounding subep-ChAT<sup>+</sup> neurons in V-SVZ and SVZ.

907 (I) Left: Analysis of EdU<sup>+</sup>/pEGFR<sup>+</sup> cells in ipsilateral (inhibition) V-SVZ vs. contralateral  
908 (control) V-SVZ of SVZ wholemounts. P = 0.039, n=13, Unpaired t-test. Data collected from four  
909 stimulated *Cr-Cre* mice. Each dot represents the total EdU<sup>+</sup>/pEGFR<sup>+</sup> cells surrounding a subep-  
910 ChAT<sup>+</sup> neuron.

911 Right: Analysis of EdU<sup>+</sup>/pEGFR<sup>+</sup> cells in ipsilateral (inhibition) SVZ vs. contralateral (control)  
912 SVZ of SVZ wholemounts. P = 0.0006, n=13, Unpaired t-test. Data collected from four stimulated  
913 *Cr-Cre* mice. Each dot represents total EdU<sup>+</sup>/pEGFR<sup>+</sup> cells surrounding a subep-ChAT<sup>+</sup> neuron.

914 All error bars indicate SEM.

915

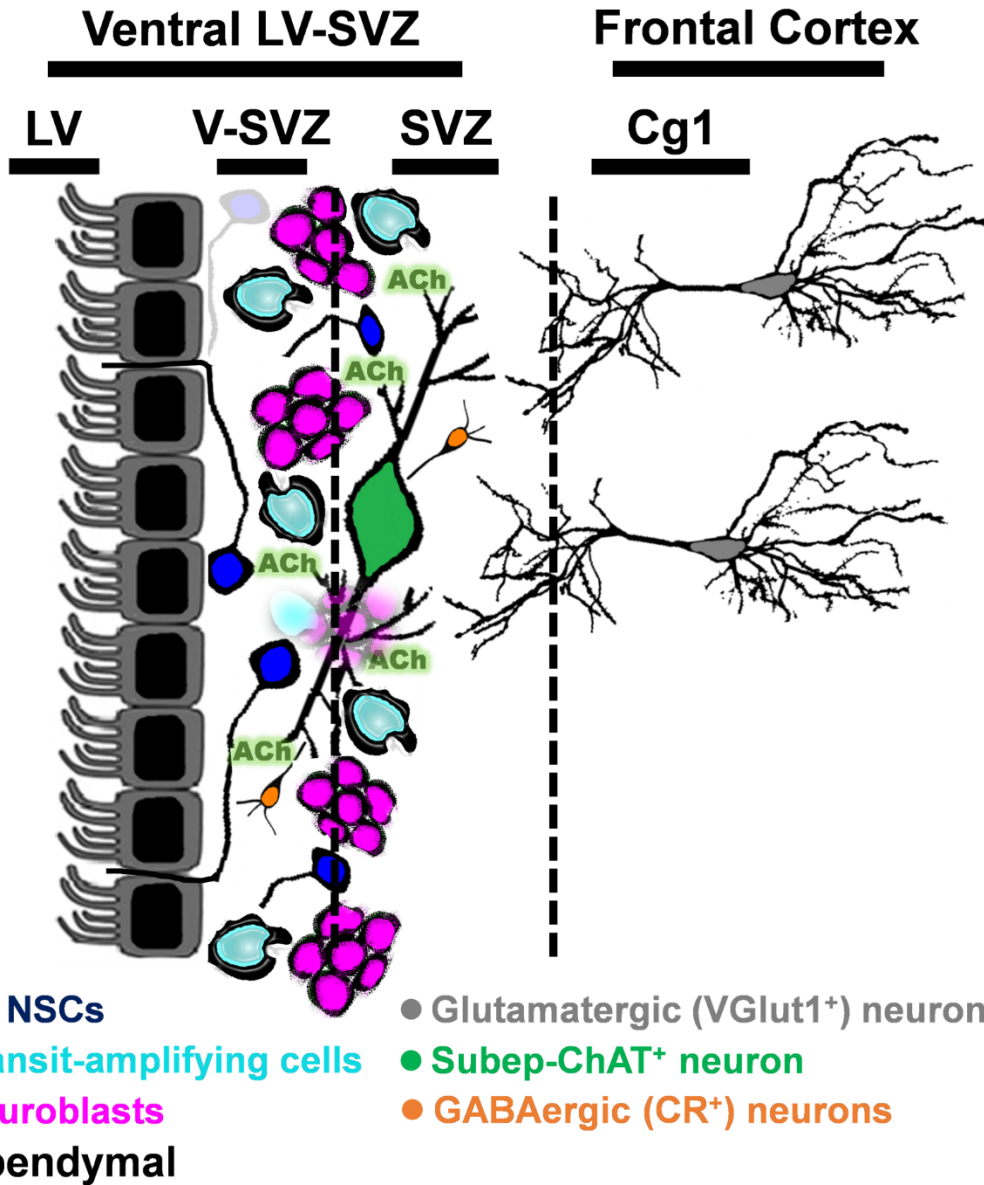

916

917 **Figure 9 Schematic summary of presynaptic inputs into subep-ChAT<sup>+</sup> neuron within LV-**  
918 **SVZ niche.**

919
